## RESEARCH ARTICLE

# Stress, anxiety, depression and sleep disturbance among healthcare professional during the COVID-19 pandemic: An umbrella review of 72 meta-analyses

Mohammed Al Maqbali<sup>1</sup>, Ahmad Alsayed<sup>2</sup>, Ciara Hughes<sup>3</sup>, Eileen Hacker<sup>4</sup>, Geoffrey L. Dickens<sup>5,6\*</sup>

**1** Fatima College of Health Sciences, Al Ain, United Arab Emirates, **2** Faculty of Pharmacy, Department of Clinical Pharmacy and Therapeutics, Applied Science Private University, Amman, Jordan, **3** Institute of Nursing and Health Research School of Health Sciences, Ulster University, Belfast, United Kingdom, **4** University of Texas MD Anderson Cancer Center, Houston, Texas, United States of America, **5** Midwifery and Health Faculty of Health and Life Sciences, Mental Health Nursing Department of Nursing, Northumbria University, Newcastle-Upon-Tyne, United Kingdom, **6** Adjunct Professor Western Sydney University, Parramatta, NSW, Australia

\* [geoffrey.dickens@northumbria.ac.uk](mailto:geoffrey.dickens@northumbria.ac.uk)

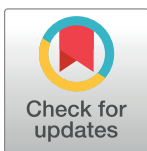

## OPEN ACCESS

**Citation:** Al Maqbali M, Alsayed A, Hughes C, Hacker E, Dickens GL (2024) Stress, anxiety, depression and sleep disturbance among healthcare professional during the COVID-19 pandemic: An umbrella review of 72 meta-analyses. PLoS ONE 19(5): e0302597. <https://doi.org/10.1371/journal.pone.0302597>

**Editor:** Fadwa Alhalaqqa, Qatar University College of Nursing, QATAR

**Received:** January 21, 2024

**Accepted:** April 8, 2024

**Published:** May 9, 2024

**Peer Review History:** PLOS recognizes the benefits of transparency in the peer review process; therefore, we enable the publication of all of the content of peer review and author responses alongside final, published articles. The editorial history of this article is available here: <https://doi.org/10.1371/journal.pone.0302597>

**Copyright:** © 2024 Al Maqbali et al. This is an open access article distributed under the terms of the [Creative Commons Attribution License](https://creativecommons.org/licenses/by/4.0/), which permits unrestricted use, distribution, and reproduction in any medium, provided the original author and source are credited.

**Data Availability Statement:** All data are in the paper and/or [supporting information files](#).

## Abstract

The outbreak of SARS-CoV-2, which causes COVID-19, has significantly impacted the psychological and physical health of a wide range of individuals, including healthcare professionals (HCPs). This umbrella review aims provide a quantitative summary of meta-analyses that have investigated the prevalence of stress, anxiety, depression, and sleep disturbance among HCPs during the COVID-19 pandemic. An umbrella review of systematic reviews and meta-analyses reviews was conducted. The search was performed using the EMBASE, PubMed, CINAHL, MEDLINE, PsycINFO, and Google Scholar databases from 01<sup>st</sup> January 2020 to 15<sup>th</sup> January 2024. A random-effects model was then used to estimate prevalence with a 95% confidence interval. Subgroup analysis and sensitivity analyses were then conducted to explore the heterogeneity of the sample. Seventy-two meta-analyses involved 2,308 primary studies were included after a full-text review. The umbrella review revealed that the pooled prevalence of stress, anxiety, depression, and sleep disturbance among HCPs during the COVID-19 pandemic was 37% (95% CI 32.87–41.22), 31.8% (95% CI 29.2–34.61) 29.4% (95% CI 27.13–31.84) 36.9% (95% CI 33.78–40.05) respectively. In subgroup analyses the prevalence of anxiety and depression was higher among nurses than among physicians. Evidence from this umbrella review suggested that a significant proportion of HCPs experienced stress, anxiety, depression, and sleep disturbance during the COVID-19 pandemic. This information will support authorities when implementing specific interventions that address mental health problems among HCPs during future pandemics or any other health crises. Such interventions may include the provision of mental health support services, such as counseling and peer support programs, as well as the implementation of organizational strategies to reduce workplace stressors.

**Funding:** The author(s) received no specific funding for this work.

**Competing interests:** The authors have declared that no competing interests exist.

## 1. Introduction

In December 2019, the coronavirus disease 2019 (COVID-19) pandemic emerged in Wuhan, China. The disease quickly spread worldwide, and the WHO declared a global health emergency in March 2020 [1]. Due to the COVID-19 pandemic, many countries implemented various measures to prevent the spread of the disease. These included implementing a partial or complete lockdown and social distancing strategies of varying intensity. The measures taken by these countries also affected the livelihood of individuals, an occurrence which might directly or indirectly also increase psychological morbidities. Undoubtedly, pandemics have a long history of impacting physical and mental health for different population groups, and HCPs are typically the most affected group in terms of bearing the burden of these illnesses [2]. In addition, several researchers have shown that work-related psychological disorders, including stress, anxiety, depression, and burnout, had already negatively affected the health-care system before the COVID-19 pandemic, leading to low-quality care and high malpractice litigation [3–5].

As a result of the pandemic, HCPs experienced various changes in their personal and professional lives. For some, these included being given more responsibility, having to re-learn how to effectively control the infection, and dealing with the emotional impact of caring for infected and dying COVID-19 patients [6]. The alteration in their work environment, as well as the likelihood that they might acquire the infection themselves, can also affect their personal mental health. It is almost inevitable that the experiences of HCPs went through during the pandemic put them at heightened risk of stress, anxiety, depression, and sleep disturbance [7,8]. It is important to understand the effects of the pandemic on the mental health and well-being of HCPs in order to help plan strategies to prevent these individuals from experiencing detrimental effects, and to ensure that they can continue to deliver healthcare services.

During previous viral outbreaks including the Severe Acute Respiratory Syndrome (SARS) and the Middle East Respiratory Syndrome (MERS) epidemics, HCPs were placed under extraordinary amounts of pressure [9,10]. Indeed, evidence suggested that HCPs suffered from high levels of stress, anxiety, depression and sleep disturbance during these outbreaks [11,12]. A high prevalence of mental health problems can adversely impact the quality of life of HCPs, increase disability, turnover, absenteeism, and errors, and can deleteriously affect patient outcomes which may lead to low patient satisfaction [13]. Further, it might increase suicidal ideation or self-harming among HCPs [14].

In the present review, four phenomena were addressed. Sleep disturbance refers to a range of sleep-related problems, including disruptions in the body's natural sleep-wake cycle, insufficient or poor-quality sleep, and sleep disorders [15]. The anxiety symptoms were defined as a state of excessive fear that translates to behavioural disturbances [16]. Major depressive disorder is a set of symptoms that includes depressed mood, loss of pleasure or interest, fatigue, changes in sleep and activity levels, and other symptoms, with a minimum duration of two weeks and at least five or more symptoms present according to the Diagnostic and Statistical Manual of Mental Disorders (DSM-5) [16]. Cohen et al., [17] define stress as "the degree to which individuals appraise situations in their lives as stressful". In this umbrella review, stress, anxiety, depression, and sleep disturbance symptoms were defined based on the validated scales/questionnaires that assess each phenomenon in the original studies.

Several primary studies and, subsequently, systematic reviews and meta-analyses have been carried out to identify the prevalence of mental health problems among HCPs during the COVID-19 pandemic. Additionally, three umbrella reviews of meta-analyses [18–20] have been published previously, but the number of meta-analyses included in both cases did not exceed twenty. Since their publication, further meta-analyses have estimated the prevalence of

stress, anxiety, depression, and sleep disturbance during the COVID-19 pandemic. The advantages of umbrella reviews include their ability to provide a comprehensive analysis of the literature, in this case about the prevalence of various mental disorders in HCPs during the COVID-19 pandemic. In addition, the results can then be used to make policy-level decisions to improve the quality of clinical care in terms of making clinical risk predictions and can inform future research priorities. Therefore, the aim of this umbrella review is to quantify meta-analytic findings aimed at estimating the prevalence symptoms of stress, anxiety, depression, and sleep disturbance among HCPs during the COVID-19 pandemic.

## 2. Methods

The umbrella review and meta-analysis were carried out according to the Preferred Reporting Items for Systematic Reviews and Meta-analyses (PRISMA) guidelines [21]. The review protocol was registered with the International Prospective Register of Systematic Reviews (PROSPERO) database and can be accessed online (CRD42022364721).

### 2.1 Search strategy

A systematic search was conducted to identify relevant meta-analyses in various electronic databases published between 1<sup>st</sup> January 2020 and 15<sup>th</sup> January 2024. The databases searched were PubMed, CINAHL, MEDLINE, EMBASE, PsycINFO, and Google Scholar. The search terms strategy used Medical Subject Headings (MeSH) and free text words with Boolean operators and truncations (AND/OR/NOT). The key search terms included (MH "Coronavirus Infections+") OR "COVID-19" OR "COVID" OR "coronavir\*" OR "Coronavirus" OR "SARS-COV2" AND "Health care provider" OR "health care professional" OR "healthcare provider\*" OR (MH "Nurses+") OR (MH "Medical Staff") OR (MH "Physician") OR (MH "Medical Doctor") OR (MH "Staff Nurses") OR "nursing staff" OR "health personnel or health professional or nurse" OR "health personnel or health professional or nurse" AND "Stress" OR "post-traumatic stress disorder" OR "panic disorder" OR "obsessive compulsive disorder" OR "anxi\*" OR (MH "Anxiety Disorders+") OR (MH "Anxiety+") OR (MH "Depression+") OR "depress\*" OR (MH "Affective Symptoms+") OR (MH "Affective Disorders+") OR (MH "Bipolar Disorder+") OR "affective" OR "mood" OR "mental" OR (MH "Mental Disorders+") OR (MH "Mental OR "psycho\*" OR (MH "Insomnia+") OR (MH "Circadian Rhythm+") OR (MH "Sleep Disorders+") OR (MH "Insomnia+") OR (MH "Sleep +") AND "Systematic Review" OR "Meta-Analysis" OR "Meta-Analytic". Additionally, the reference lists were searched to find any other studies.

### 2.2 Study selection

Two reviewers (A.M.; A.A.) independently extracted the data from the search, scrutinizing all titles and abstracts for eligibility against the inclusion and exclusion criteria. A third reviewer (G.D.) was available to resolve any disagreements through discussion. Systematic reviews incorporating meta-analyses were included according to the following criteria. The studies: (1) examined the prevalence of stress or anxiety or depression or sleep disturbance symptoms; (2) presented results for HCPs as a group or separately (e.g., nurses or physicians only); further, studies involving non-HCPs must have presented results for HCPs separately and not pooled with non-HCPs.; (3) were conducted during the COVID-19 pandemic; (4) were published in English; (5) involved a systematic review with meta-analysis. Studies were excluded if (1) these consisted of a systematic review without meta-analysis; (2) consisted of a literature review or a narrative review (3) the participants were general population or non-HCPs.

### 2.3 Quality assessment

The methodological quality assessment of each meta-analysis was blindly rated by two reviewers using the Assessment of Multiple Systematic Reviews (AMSTAR-2) tool [22]. This scale consists of 16 items that evaluate the risk of bias of a systematic review. Items 1, 3, 5, 6, 10, 13, 14, and 16 are evaluated with either a "Yes" or "No" response. Items 2, 4, 7, 8, and 9 are evaluated with "Yes," "Partial Yes," or "No" responses. Items 11, 12, and 15 are evaluated with "Yes," "No," or "No meta-analysis conducted" responses. The overall rating can be rated as "High," "Moderate," "Low," or "Critically low."

### 2.4 Credibility of evidence

The credibility of the evidence of each association provided was evaluated by the Fusar-Poli and Radua [23] classification criteria. The level of evidence as convincing (class I) when specific criteria were met, including more than 1000 cases,  $p < 10^{-6}$ ,  $I^2$  higher than 50%, 95% prediction intervals excluding the null, no small-study effects, and no publication bias. If the number of cases exceeded 1000,  $p < 10^{-6}$ , the largest study showed a statistically significant effect, but not all class I criteria were satisfied; the evidence level was considered highly suggestive (class II). When there were over 1000 cases,  $p < 10^{-3}$ , but no other class I or II criteria were met, the evidence level was termed suggestive (class III). If no class I-III criteria were met, the evidence level was classified as weak (class IV). The fourth level, termed weak evidence (class IV), included associations with a  $p \leq 0.05$ , but these associations did not meet the criteria for class I, class II, or class III. The fifth level, denoted as non-significant (NS), comprised associations with a  $p > 0.05$ .

### 2.5 Data analyses

There are two methods exist for deriving effect size estimates from existing meta-analyses. The first approach involves conducting a meta-analysis on the effect size estimates taken from individual studies included in multiple prior meta-analyses [24]. However, this method demands significant time and resources. Furthermore, it contradicts the primary purpose of an umbrella review because it requires return to the original studies.

The second approach employs a statistical technique to efficiently summarize data from previous meta-analyses without the need to go back to the individual studies. This method relies solely on the summary effect sizes and their associated variances provided in the original meta-analyses [25]. It calculates an overall effect size for the combined meta-analyses by computing a weighted average of the summary effect sizes, with the weights determined by the inverse of the variances [26]. This approach is similar to the methods used in meta-analyses of primary studies. Although the second approach (combining summary effect sizes) may not achieve the same level of precision as the first method (combining all individual studies), empirical tests have confirmed its ability to generate a statistically valid estimate for the overall effect size [27,28]. In this umbrella review, we employed the second approach, which entailed the utilization of aggregate data derived from the meta-analyses.

The analyses were conducted using R software, version 4.3.1 (R Foundation for Statistical Computing), with packages used 'meta' [29], 'metafore' [30] and 'metaumbrella' [31]. Pooled estimates prevalence with 95% Confidence Intervals (CIs) was conducted using random effect models, and the results were reported on a forest plot. In addition, the I-squared ( $I^2$ ) test was used to assess the statistical heterogeneity of the included meta-analyses. A value of  $I^2 < 25\%$  was considered low, 25–50% moderate, and  $> 50\%$  high [32]. Subgroup analyses were performed when there were at least four meta-analyses per subgroup.

Publication bias was assessed using Egger's test with a  $p < 0.10$  indicates a statistically significant small-study effect [33]. Statistical significance was set at  $p < 0.05$ . If publication bias was identified, trim and fill methods were used to adjust the publication bias [34]. A sensitivity analysis was conducted in which individual meta-analyses were systematically removed one at a time to assess how they affected the overall combined prevalence of the remaining meta-analyses [35], with the aim of clarifying the stability and reliability of the finding [36].

### 3. Result

A total of 1,987 papers were identified through the database search. Out of these, 1,843 were excluded at the abstract and title screening stage for the following reasons: 786 were duplicates, 443 did not include a meta-analysis, 392 lacked information about prevalence, 139 lacked information about HCP status, and 83 were not conducted during the period of the COVID-19 pandemic. A further 72 papers were excluded during the full text review process. As a result, 72 meta-analyses were eligible for umbrella review (Fig 1).

#### 3.1 General characteristics of the studies included

The included 72 meta-analyses [37–108]. Fifty-four of the meta-analyses dealt with HCPs in general, whereas two meta-analyses reported the situation only with regard to physicians or nurses [44,59], three meta-analyses dealt with nurses [49,79,91], and one dealt with physicians [88], while 17 meta-analyses included a mixed population (General and HCPs), (Only data specifically related to healthcare professionals were included in the umbrella review analysis). The most commonly used statistical software was STATA ( $n = 32$ ), R ( $n = 17$ ) and comprehensive meta-analysis ( $n = 11$ ). Twenty-four meta-analyses used the Newcastle–Ottawa scale to assess the quality of the studies. Forty-six meta-analyses included mixed studies from different countries, twenty-five meta-analyses were conducted in specific geographical areas: 10 for China, five for India, four for Asia two for Bangladesh and Ethiopia and one for each of the following: Egypt, South Asia, and Vietnam. The detailed characteristics of the studies including meta-analyses are shown in Table 1.

#### 3.2 Quality appraisal

Each meta-analysis was assessed using the AMSTAR-2 tool. Twenty-nine meta-analyses were classified as moderate quality and thirty-seven as low quality. Only six meta-analyses were classified as critically low quality [37,44,45,76,97,101].

#### 3.3 Prevalence of stress

Stress was reported in 42 meta-analyses among HCPs. The estimation of prevalence for stress varied between 11% [72] and 66.6% [58] (Fig 2: Forest Plots). The pooled prevalence of stress from was 37% (292,245/854,852 participants, 95% CI 32.87–41.22) with 95% PI: 14.86–66.3. There was significant heterogeneity between meta-analyses when it came to estimating the prevalence of stress ( $p < 0.0001$ ,  $I^2 = 99.9\%$ ). In the subgroup analysis, the prevalence of anxiety among nurses was determined to be 42.6% ( $n = 5$ ; 95% CI = 30.49–55.27,  $I^2 = 99\%$ ), as shown in Fig 3: Forest Plots. However, the analysis for physicians was not conducted due to an insufficient number of available meta-analyses. In sensitivity analysis, none of the meta-analyses resulted in changes to the pooled prevalence estimates greater than a 2%. The prevalence rate estimates for stress were considered to be suggestive evidence (class III) (Seen Table 2).

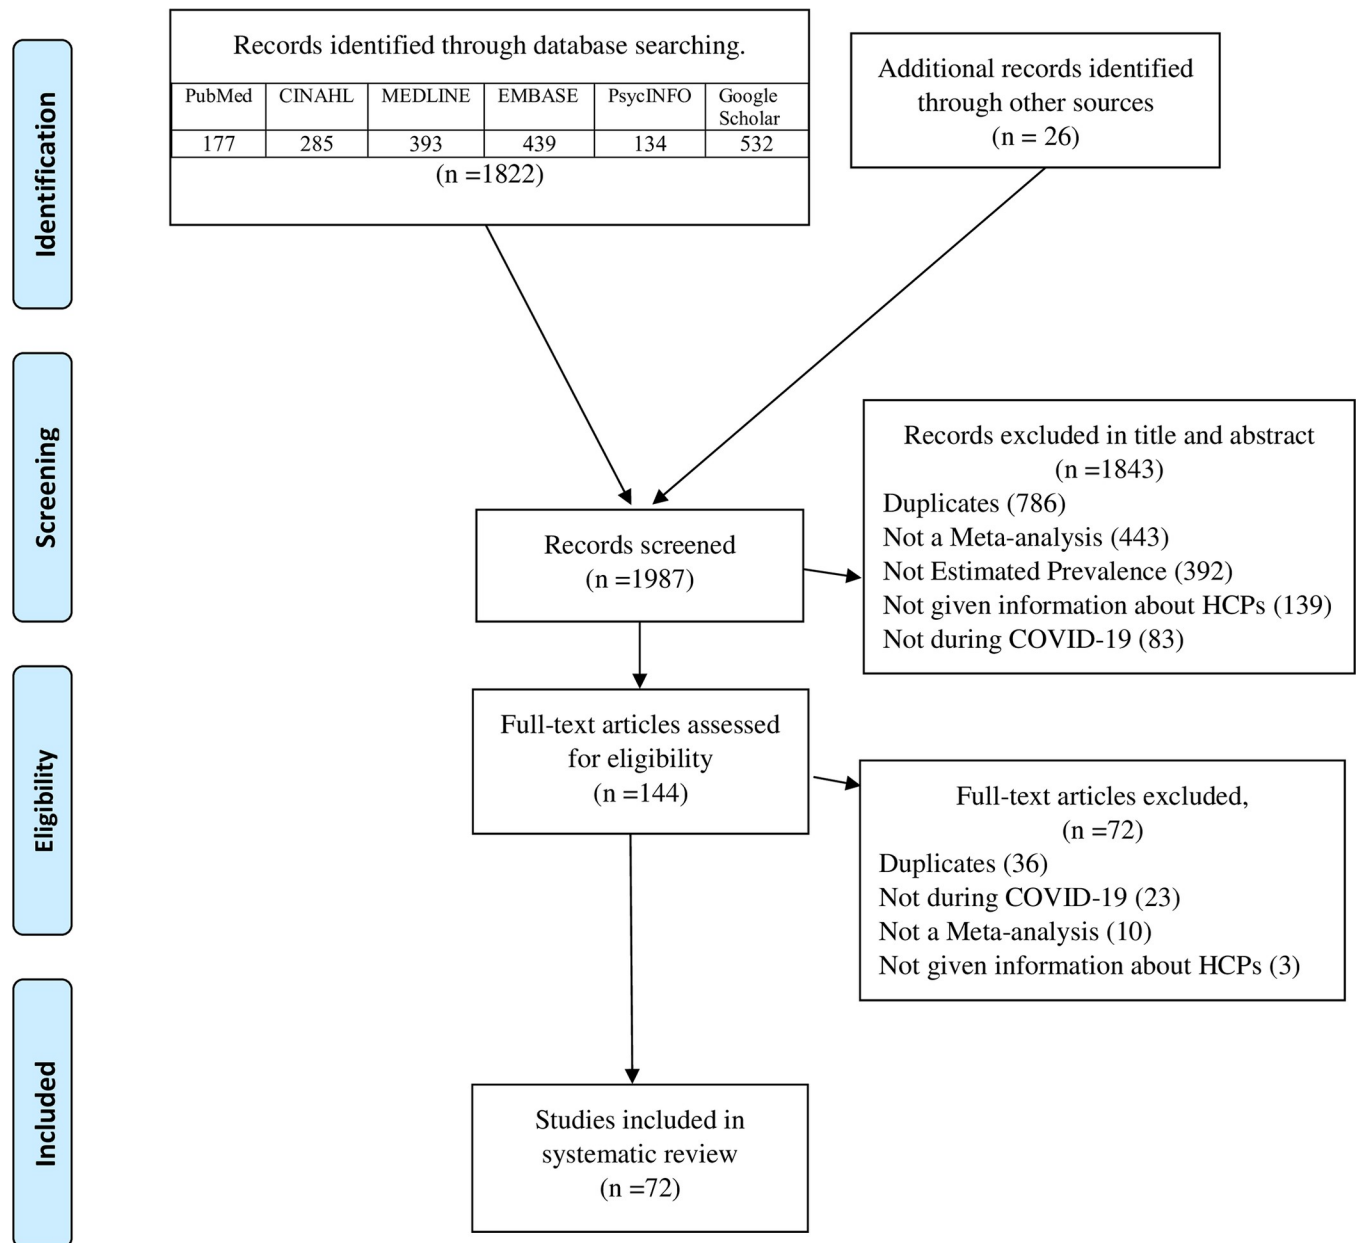

Fig 1. PRISMA diagram.

<https://doi.org/10.1371/journal.pone.0302597.g001>

### 3.4 Prevalence of anxiety

Fifty-five meta-analyses estimated the prevalence of anxiety among HCPs, and ranged from 11.4% [40] to 71.9% [58]. The pooled prevalence of anxiety was 31.8% (734,036/2,310,774 participants, 95% CI 29.2–34.61) with 95% PI: 15.24–54.83 (Fig 4: Forest Plots) among all HCPs and there was considerable heterogeneity ( $p < 0.0001$ ,  $I^2 = 99.9\%$ ). In the subgroup analyses, in terms of professional status, the pooled prevalence of anxiety was 31.6% ( $n = 12$ ; 95% CI = 28.33–35.14,  $I^2 = 99\%$ ) and 26.3% ( $n = 9$ ; 95% CI = 22.89–30.10,  $I^2 = 99\%$ ) for nurses, and physicians respectively (Figs 5 and 6: Forest Plots). A sensitivity analysis, specifically a leave-

Table 1. Characteristics of the included meta-analyses (N = 72).

| Study                               | Total Study Included | Outcome           | Population | Study Included | Prevalence | 95% CI    | I <sup>2</sup> | Events | Sample size | Analysis Software | Model | Appraisal Tool | AMSTAR-2 Quality | Remarks    |
|-------------------------------------|----------------------|-------------------|------------|----------------|------------|-----------|----------------|--------|-------------|-------------------|-------|----------------|------------------|------------|
| 1 (Batra et al. 2020) [38]          | 65                   | Stress            | All        | 17             | 40.3       | 31.4–50.0 | 99.1           | 6543   | 16235       | CMA               | REM   | NIH            | Moderate         | HCPs       |
|                                     |                      | Anxiety           | All        | 46             | 34.4       | 29.5–39.7 | 99.1           | 17749  | 51596       |                   |       |                |                  |            |
|                                     |                      |                   | Nurses     | 8              | 39.3       | 27.5–52.5 | 98.9           | 8606   | 21899       |                   |       |                |                  |            |
|                                     |                      |                   | Physicians | 8              | 32.5       | 21.9–45.2 | 99.0           | 7117   | 21899       |                   |       |                |                  |            |
|                                     |                      | Depression        | All        | 46             | 31.8       | 26.8–37.2 | 99.2           | 16906  | 53164       |                   |       |                |                  |            |
|                                     |                      |                   | Nurses     | 9              | 42.4       | 30.4–54   | 99.0           | 9301   | 21936       |                   |       |                |                  |            |
|                                     |                      |                   | Physicians | 9              | 39.1       | 27.3–52.2 | 98.4           | 8577   | 21936       |                   |       |                |                  |            |
| 2 (Krishnamoorthy et al. 2020) [39] | 23                   | Stress            | All        | 5              | 33         | 19–50     | 98.4           | 1986   | 6017        | STATA             | REM   | NOS            | Moderate         | Mixed      |
|                                     |                      | Anxiety           | All        | 16             | 24         | 16–32     | 99.6           | 9201   | 38337       |                   |       |                |                  |            |
|                                     |                      | Depression        | All        | 16             | 25         | 19–32     | 99.4           | 9425   | 37701       |                   |       |                |                  |            |
|                                     |                      | Sleep Disturbance | All        | 5              | 43         | 28–59     | 99.2           | 2010   | 4675        |                   |       |                |                  |            |
| 3 (Pappa et al. 2020) [41]          | 13                   | Anxiety           | All        | 12             | 23.2       | 17.8–29.1 | 99             | 7367   | 31756       | MetaXL            | REM   | NOS            | Moderate         | HCPs       |
|                                     |                      |                   | Nurses     | 6              | 25.8       | 19.2–33.0 | 98             | 5160   | 19999       |                   |       |                |                  |            |
|                                     |                      |                   | Physicians | 6              | 21.7       | 15.3–29   | 97             | 4340   | 19999       |                   |       |                |                  |            |
|                                     |                      | Depression        | All        | 10             | 22.8       | 15.1–31.5 | 99.6           | 7071   | 31014       |                   |       |                |                  |            |
|                                     |                      |                   | Nurses     | 5              | 30.3       | 18.2–43.8 | 99.5           | 5679   | 18742       |                   |       |                |                  |            |
|                                     |                      |                   | Physicians | 5              | 25.4       | 16.6–35.2 | 98             | 4760   | 18742       |                   |       |                |                  |            |
|                                     |                      | Sleep Disturbance | All        | 5              | 34.3       | 27.5–41.5 | 98             | 2935   | 8558        |                   |       |                |                  |            |
| 4 (Qiu et al. 2020) [42]            | 52                   | Sleep Disturbance | All        | 52             | 39.2       | 36.0–42.7 | 98.3           | 12446  | 31749       | R                 | REM   | Loney          | Low              | HCPs/China |
|                                     |                      |                   | Nurses     | 41             | 39.4       | 35.7–43.5 | 98.4           | 9878   | 25070       |                   |       |                |                  |            |
|                                     |                      |                   | Physicians | 3              | 34.2       | 12.6–55.8 | 99.2           | 720    | 2104        |                   |       |                |                  |            |
| 5 (Salari et al. 2020a) [44]        | 7                    | Sleep Disturbance | Nurses     | 6              | 34.8       | 24.8–46.4 | 97.4           | 2526   | 7259        | CMA               | REM   | STROBE         | Critically Low   | HCPs       |

(Continued)

Table 1. (Continued)

| Study                                 | Total Study Included | Outcome           | Population | Study Included | Prevalence | 95% CI    | I <sup>2</sup> | Events | Sample size | Analysis Software | Model | Appraisal Tool | AMSTAR-2 Quality | Remarks         |
|---------------------------------------|----------------------|-------------------|------------|----------------|------------|-----------|----------------|--------|-------------|-------------------|-------|----------------|------------------|-----------------|
| 6 (Salari et al. 2020b) [45]          | 29                   | Stress            | All        | 8              | 36.4       | 18.3–59.5 | 99             | 1293   | 3551        | CMA               | REM   | STROBE         | Critically Low   | HCPs /Frontline |
| 7 (Allan et al. 2020) [37]            | 9                    | Stress            | All        | 9              | 23.4       | 16.3–31.2 | 96             | 970    | 4147        | R                 | REM   | NIH            | Critically Low   | HCPs            |
| 8 (Salazar de Pablo et al. 2020) [46] | 15                   | Stress            | All        | 3              | 29.9       | 8.9–65.2  | 99.7           | 2030   | 6789        | CMA               | REM   | MMAT           | Moderate         | Mixed           |
| 9 (Ren et al. 2020) [43]              | 5                    | Anxiety           | All        | 4              | 22.2       | 12.7–35.8 | 99             | 1713   | 7716        | STATA             | REM   | AHRQ           | Low              | Mixed           |
| 10 (Pan et al. 2020) [40]             | 7                    | Depression        | All        | 3              | 25         | 4–45      | 99.7           | 1166   | 4663        | STATA             | REM   | STROBE         | Low              | Mixed           |
| 11 (Zhang et al. 2021) [82]           | 26                   | Sleep Disturbance | All        | 8              | 42.1       | 26.0–60.0 | 99.5           | 3866   | 9183        | R                 | REM   | NIH            | Moderate         | HCPs/ China     |
| 12 (Adibi et al. 2021) [48]           | 19                   | Anxiety           | All        | 23             | 27.0       | 21.0–34.0 | 99.0           | 5791   | 21447       | STATA             | REM   | NG             | Low              | HCPs            |
| 13 (Al Maqbali et al. 2021) [49]      | 93                   | Stress            | Nurses     | 40             | 43         | 37–49     | 98             | 11625  | 27034       | CMA               | REM   | NOS            | Moderate         | Nurses          |
| 14 (Alimoradi et al. 2021) [50]       | 62                   | Sleep Disturbance | All        | 62             | 43         | 39–47     | 99.3           | 25521  | 59350       | STATA             | REM   | NOS            | Low              | Mixed           |
| 15 (Bareeqa et al. 2021) [51]         | 8                    | Depression        | All        | 8              | 31.5       | 20.7–43.5 | 99.3           | 3234   | 10267       | OMA               | REM   | NOS            | Low              | Mixed/ China    |

(Continued)



Table 1. (Continued)

| Study                       | Total Study Included | Outcome           | Population | Study Included | Prevalence | 95% CI    | I <sup>2</sup> | Events | Sample size | Analysis Software | Model | Appraisal Tool | AMSTAR-2 Quality | Remarks    |
|-----------------------------|----------------------|-------------------|------------|----------------|------------|-----------|----------------|--------|-------------|-------------------|-------|----------------|------------------|------------|
| 16 (Cénat et al. 2021) [52] | 27                   | Stress            | All        | 4              | 21.0       | 9.0–43.0  | 99.7           | 1444   | 6878        | R                 | REM   | JBI            | Moderate         | Mixed      |
|                             |                      | Anxiety           | All        | 23             | 15.9       | 12.2–20.3 | 99             | 5895   | 37076       |                   |       |                |                  |            |
|                             |                      | Depression        | All        | 18             | 14         | 11.0–17.0 | 95.3           | 4781   | 34151       |                   |       |                |                  |            |
|                             |                      | Sleep Disturbance | All        | 6              | 16         | 8.0–30.0  | 99.8           | 993    | 6209        |                   |       |                |                  |            |
| 17 (Ching et al. 2021) [53] | 148                  | Stress            | All        | 40             | 36.4       | 23.2      | 49.7           | 12380  | 34010       | OMA               | REM   | STROBE         | Low              | HCPs/Asia  |
|                             |                      | Anxiety           | All        | 117            | 39.7       | 34.3–45.1 | 99.8           | 39557  | 99639       |                   |       |                |                  |            |
|                             |                      | Depression        | All        | 98             | 37.5       | 33.8–41.3 | 99.5           | 38861  | 103628      |                   |       |                |                  |            |
| 18 (Dutta et al. 2021) [57] | 33                   | Stress            | All        | 17             | 37.7       | 24.0–52.3 | 100            | 10269  | 27238       | MetaXL            | REM   | NOS            | Low              | HCPs       |
|                             |                      | Anxiety           | All        | 31             | 32.5       | 26.4–39   | 99             | 7628   | 23472       |                   |       |                |                  |            |
|                             |                      | Depression        | All        | 30             | 32.4       | 25.6–39.3 | 99             | 12200  | 37655       |                   |       |                |                  |            |
|                             |                      | Sleep Disturbance | All        | 11             | 36.6       | 36.6–48.3 | 99             | 3810   | 10411       |                   |       |                |                  |            |
| 19 (Hao et al. 2021) [60]   | 20                   | Stress            | All        | 5              | 25.6       | 11.8–39.4 | 99             | 790    | 3085        | R                 | REM   | AHRQ           | Low              | HCPs       |
|                             |                      | Anxiety           | All        | 16             | 28.6       | 22.4–36.4 | 99             | 2864   | 10015       |                   |       |                |                  |            |
|                             |                      | Depression        | All        | 14             | 24.1       | 16.2–32.1 | 99             | 1915   | 7948        |                   |       |                |                  |            |
|                             |                      | Sleep Disturbance | All        | 5              | 44.1       | 31.3–57   | 98             | 1607   | 3643        |                   |       |                |                  |            |
| 20 (Yan et al. 2021) [81]   | 35                   | Stress            | All        | 4              | 56         | 32–79     | 97             | 428    | 765         | R                 | REM   | STROBE         | Low              | HCPs/China |
|                             |                      | Anxiety           | All        | 29             | 41         | 35–47     | 98             | 6439   | 15704       |                   |       |                |                  |            |
|                             |                      | Depression        | All        | 20             | 27         | 20–32     | 94             | 5680   | 21038       |                   |       |                |                  |            |
|                             |                      | Sleep Disturbance | All        | 8              | 41         | 33–50     | 98             | 3065   | 7476        |                   |       |                |                  |            |
| 21 (Liu et al. 2021) [65]   | 33                   | Stress            | All        | 5              | 30.6       | 9.1–65.9  | 98             | 979    | 3200        | CMA               | REM   | NOS            | Low              | Mixed      |

(Continued)

Table 1. (Continued)

| Study                             | Total Study Included | Outcome           | Population | Study Included | Prevalence | 95% CI    | I <sup>2</sup> | Events | Sample size | Analysis Software | Model | Appraisal Tool | AMSTAR-2 Quality | Remarks     |
|-----------------------------------|----------------------|-------------------|------------|----------------|------------|-----------|----------------|--------|-------------|-------------------|-------|----------------|------------------|-------------|
|                                   |                      | Anxiety           | All        | 31             | 32.7       | 29.9–38.2 | 98             | 12340  | 37736       |                   |       |                |                  |             |
|                                   |                      | Depression        | All        | 23             | 25.8       | 20.4–31.0 | 98             | 9347   | 36230       |                   |       |                |                  |             |
|                                   |                      | Sleep Disturbance | All        | 8              | 37.3       | 32.1–42.8 | 98             | 3649   | 9784        |                   |       |                |                  |             |
| 22 (Mahmud et al. 2021) [66]      | 69                   | Stress            | All        | 41             | 44.9       | 37–51.7   | 99.8           | 37170  | 82783       | STATA             | REM   | STROBE         | Low              | HCPs        |
|                                   |                      | Anxiety           | All        | 75             | 41.4       | 36.2–46.7 | 99.8           | 61038  | 147435      |                   |       |                |                  |             |
|                                   |                      | Depression        | All        | 69             | 37.1       | 31.8–42.4 | 99.8           | 53665  | 144649      |                   |       |                |                  |             |
|                                   |                      | Sleep Disturbance | All        | 21             | 43.8       | 35.8–51.7 | 99.4           | 14616  | 33370       |                   |       |                |                  |             |
| 23 (Marvaldi et al. 2021) [67]    | 70                   | Stress            | All        | 9              | 31.4       | 17.5–47.3 | 99.8           | 7979   | 25412       | OMA               | REM   | AHRQ           | Moderate         | HCPs        |
|                                   |                      | Anxiety           | All        | 22             | 30         | 24.2–37   | 99.6           | 15583  | 51942       |                   |       |                |                  |             |
|                                   |                      | Depression        | All        | 25             | 31.1       | 25.7–36.8 | 99.6           | 21157  | 68030       |                   |       |                |                  |             |
|                                   |                      | Sleep Disturbance | All        | 10             | 44         | 24.6–64.5 | 99.8           | 5468   | 12428       |                   |       |                |                  |             |
| 24 (Phiri et al. 2021) [70]       | 83                   | Stress            | All        | 19             | 23.2       | 10.5–35.9 | 99.8           | 10666  | 45976       | STATA             | REM   | NOS            | Moderate         | Mixed       |
|                                   |                      | Anxiety           | All        | 67             | 21.9       | 18.7–25   | 99.7           | 24296  | 110940      |                   |       |                |                  |             |
|                                   |                      | Depression        | All        | 67             | 23.4       | 20.6–26.3 | 99.5           | 28699  | 122644      |                   |       |                |                  |             |
|                                   |                      | Sleep Disturbance | All        | 17             | 24         | 16.4–31.6 | 99.5           | 9626   | 40110       |                   |       |                |                  |             |
| 25 (Santabábara et al. 2021) [73] | 71                   | Anxiety           | All        | 71             | 25         | 21–29     | 99.1           | 14641  | 58565       | STATA             | REM   | JBI            | Low              | HCPs        |
|                                   |                      |                   | Nurses     | 17             | 27         | 20–34     | 97.8           | 1856   | 6875        |                   |       |                |                  |             |
|                                   |                      |                   | Physicians | 13             | 17         | 12–22     | 95.6           | 880    | 5177        |                   |       |                |                  |             |
| 26 (Saragih et al. 2021) [77]     | 38                   | Stress            | All        | 14             | 37         | 25–50     | 99.8           | 5695   | 15391       | STATA             | REM   | JBI            | Low              | HCPs        |
|                                   |                      | Anxiety           | All        | 33             | 40         | 29–52     | 99.8           | 12453  | 31132       |                   |       |                |                  |             |
|                                   |                      | Depression        | All        | 30             | 37         | 29–45     | 99.7           | 16738  | 45238       |                   |       |                |                  |             |
| 27 (Singh et al. 2021) [76]       | 6                    | Stress            | All        | 6              | 65.1       | 48.2–80.3 | 98.6           | 1577   | 2423        | STATA             | REM   | NIH            | Critically Low   | Mixed/India |
|                                   |                      | Anxiety           | All        | 5              | 35.3       | 26.3–44.9 | 92.3           | 658    | 1863        |                   |       |                |                  |             |

(Continued)

Table 1. (Continued)

| Study                                | Total Study Included | Outcome           | Population | Study Included | Prevalence | 95% CI    | I <sup>2</sup> | Events | Sample size | Analysis Software | Model | Appraisal Tool | AMSTAR-2 Quality | Remarks           |
|--------------------------------------|----------------------|-------------------|------------|----------------|------------|-----------|----------------|--------|-------------|-------------------|-------|----------------|------------------|-------------------|
|                                      |                      | Depression        | All        | 6              | 35.4       | 25.1–46.4 | 97.6           | 1534   | 4333        |                   |       |                |                  |                   |
| 28 (Sun et al. 2021) [77]            | 47                   | Anxiety           | All        | 44             | 37         | 31–42     | 99.9           | 23828  | 64401       | STATA             | REM   | NOS            | Low              | HCPs              |
|                                      |                      |                   | Nurses     | 9              | 34         | 26–41     | 99             | 9310   | 27382       |                   |       |                |                  |                   |
|                                      |                      |                   | Physicians | 9              | 28         | 19–38     | 99.1           | 7667   | 27382       |                   |       |                |                  |                   |
|                                      |                      | Depression        | All        | 39             | 39         | 31–41     | 99.6           | 30395  | 77936       |                   |       |                |                  |                   |
|                                      |                      |                   | Nurses     | 8              | 38         | 30–46     | 99             | 10339  | 27209       |                   |       |                |                  |                   |
|                                      |                      |                   | Physicians | 8              | 33         | 26–40     | 97.9           | 8979   | 27209       |                   |       |                |                  |                   |
|                                      |                      | Sleep Disturbance | All        | 9              | 32         | 23–42     | 99.5           | 4040   | 12626       |                   |       |                |                  |                   |
| 29 (Varghese et al. 2021) [79]       | 26                   | Stress            | Nurses     | 10             | 40.6       | 25.6–56.8 | 98.6           | 1707   | 4204        | OMA               | REM   | Loney          | Low              | Nurses            |
|                                      |                      | Anxiety           | Nurses     | 21             | 33         | 24–43     | 99.4           | 4502   | 13641       |                   |       |                |                  |                   |
|                                      |                      | Depression        | Nurses     | 17             | 32         | 21–44     | 99.4           | 3934   | 12294       |                   |       |                |                  |                   |
| 30 (Wu et al. 2021) [95]             | 29                   | Stress            | All        | 5              | 41.2       | 19.8–64.5 | 99.8           | 4188   | 10165       | STATA             | REM   | STROBE         | Moderate         | Mixed             |
|                                      |                      | Anxiety           | All        | 23             | 29         | 23.6–34.7 | 99.4           | 14541  | 50143       |                   |       |                |                  |                   |
|                                      |                      | Depression        | All        | 23             | 31         | 24.7–37.5 | 99.5           | 12986  | 41889       |                   |       |                |                  |                   |
|                                      |                      | Sleep Disturbance | All        | 7              | 47.3       | 38.8–55.8 | 98.7           | 6326   | 13375       |                   |       |                |                  |                   |
| 31 (Xia et al. 2021) [80]            | 17                   | Sleep Disturbance | All        | 15             | 45.1       | 37.2–53.1 | 98.7           | 5530   | 12261       | STATA             | REM   | Loney          | Moderate         | HCPs /China       |
| 32 (Deng et al. 2021) [55]           | 34                   | Anxiety           | All        | 22             | 40         | 33–46     | 99             | 4560   | 11401       | R                 | REM   | AHRQ           | Low              | HCPs /China       |
|                                      |                      | Depression        | All        | 20             | 31         | 25–37     | 98.4           | 3546   | 11438       |                   |       |                |                  |                   |
| 33 (Dong et al. 2021) [56]           | 22                   | Stress            | All        | 9              | 29.1       | 24.3–33.8 | 96.9           | 4258   | 14631       | STATA             | REM   | AHRQ           | Moderate         | HCPs /China       |
|                                      |                      | Anxiety           | All        | 22             | 34.4       | 29.5–39.4 | 98.8           | 10338  | 30052       |                   |       |                |                  |                   |
|                                      |                      | Depression        | All        | 18             | 31.1       | 24.5–37.7 | 99.2           | 6827   | 21953       |                   |       |                |                  |                   |
| 34 (Serrano-Ripoll et al. 2021) [75] | 13                   | Sleep Disturbance | All        | 13             | 38         | 37–39     | 99             | 5349   | 14075       | STATA             | REM   | MU             | Moderate         | HCPs              |
| 35 (Hossain et al. 2021) [62]        | 17                   | Anxiety           | All        | 15             | 43.6       | 33.1–54.5 | 99.2           | 6557   | 15038       | STATA             | REM   | NOS            | Low              | Mixed/ South Asia |
|                                      |                      | Depression        | All        | 14             | 29.9       | 23.9–36.6 | 98.1           | 4984   | 16670       |                   |       |                |                  |                   |
| 36 (Li et al. 2021) [64]             | 65                   | Stress            | All        | 9              | 21.5       | 10.5–34.9 | 99.7           | 5254   | 24439       | STATA             | REM   | MU             | Low              | HCPs              |

(Continued)

Table 1. (Continued)

| Study                             | Total Study Included | Outcome           | Population | Study Included | Prevalence | 95% CI    | I <sup>2</sup> | Events | Sample size | Analysis Software | Model | Appraisal Tool | AMSTAR-2 Quality | Remarks    |
|-----------------------------------|----------------------|-------------------|------------|----------------|------------|-----------|----------------|--------|-------------|-------------------|-------|----------------|------------------|------------|
|                                   |                      | Anxiety           | All        | 57             | 22.1       | 18.2–26.3 | 99.4           | 16416  | 74280       |                   |       |                |                  |            |
|                                   |                      | Depression        | All        | 55             | 21.7       | 18.3–25.2 | 99.3           | 18373  | 84666       |                   |       |                |                  |            |
| 37 (El-Qushayri et al. 2021) [58] | 10                   | Stress            | All        | 6              | 66.6       | 47.6–81.3 | 98             | 1273   | 1911        | CMA               | REM   | NIH            | Moderate         | HCPs/Egypt |
|                                   |                      | Anxiety           | All        | 4              | 71.9       | 49.4–86.9 | 98             | 966    | 1344        |                   |       |                |                  |            |
|                                   |                      | Depression        | All        | 5              | 65.5       | 46.9–80.3 | 98             | 1090   | 1664        |                   |       |                |                  |            |
| 38 (Jahrami et al. 2021) [63]     | 11                   | Sleep Disturbance | All        | 11             | 36         | 21.1–54.2 | 99             | 1747   | 4854        | R                 | REM   | NOS            | Moderate         | Mixed      |
| 39 (Olaya et al. 2021) [69]       | 57                   | Depression        | All        | 46             | 24         | 20–25     | 99.3           | 12846  | 53527       | STATA             | REM   | JBI            | Low              | HCPs       |
|                                   |                      |                   | Nurses     | 14             | 25         | 18–33     | 97.7           | 1471   | 5883        |                   |       |                |                  |            |
|                                   |                      |                   | Physicians | 10             | 24         | 16–31     | 96.9           | 1024   | 4266        |                   |       |                |                  |            |
| 40 (Raoofi et al. 2021) [71]      | 46                   | Anxiety           | All        | 46             | 26.1       | 19–34.6   | 99             | 16065  | 61551       | R                 | REM   | NOS            | Low              | HCPs       |
|                                   |                      |                   | Nurses     | 31             | 24.7       | 17.6–33.5 | 99             | 3074   | 12447       |                   |       |                |                  |            |
|                                   |                      |                   | Physicians | 17             | 24         | 12.6–40.9 | 99             | 1239   | 5162        |                   |       |                |                  |            |
| 41 (Salehi et al. 2021) [72]      | 4                    | Stress            | All        | 4              | 11         | 5–16      | 95             | 217    | 1977        | STATA             | REM   | STROBE         | Moderate         | Mixed      |
| 42 (Abdulla et al. 2021) [47]     | 23                   | Stress            | All        | 12             | 58.1       | 44.8–71.3 | 99             | 2445   | 4209        | Rev               | REM   | 27-itmes       | Moderate         | HCPs/India |
|                                   |                      | Anxiety           | All        | 10             | 42.9       | 30.3–55.5 | 98             | 1312   | 3059        |                   |       |                |                  |            |
|                                   |                      | Depression        | All        | 5              | 41.9       | 29.2–54.6 | 99             | 2429   | 5796        |                   |       |                |                  |            |
| 43 (Crocamo et al. 2021) [54]     | 14                   | Depression        | All        | 14             | 23.8       | 16.2–32.2 | 99             | 3373   | 14173       | STATA             | REM   | NOS            | Low              | HCPs       |
| 44 (Halemani et al. 2021) [59]    | 13                   | Stress            | Nurses     | 4              | 37         | 8–66      | 99.6           | 720    | 1946        | STATA             | REM   | NOS            | Low              | HCPs       |
|                                   |                      |                   | Physicians | 3              | 37         | 6–68      | 99             | 343    | 928         |                   |       |                |                  |            |
|                                   |                      | Anxiety           | Nurses     | 13             | 42         | 33–50     | 97             | 1750   | 4167        |                   |       |                |                  |            |
|                                   |                      |                   | Physicians | 12             | 34         | 26–42     | 95             | 1127   | 3315        |                   |       |                |                  |            |
|                                   |                      | Depression        | Nurses     | 13             | 42         | 32–50     | 97             | 1750   | 4167        |                   |       |                |                  |            |
|                                   |                      |                   | Physicians | 12             | 34         | 23–45     | 97             | 1127   | 3315        |                   |       |                |                  |            |
|                                   |                      | Sleep Disturbance | Nurses     | 4              | 44         | 35–53     | 91             | 637    | 1447        |                   |       |                |                  |            |
|                                   |                      |                   | Physicians | 4              | 35         | 26–43     | 91             | 500    | 1428        |                   |       |                |                  |            |

(Continued)

Table 1. (Continued)

| Study                            | Total Study Included | Outcome           | Population | Study Included | Prevalence | 95% CI    | I <sup>2</sup> | Events | Sample size | Analysis Software | Model | Appraisal Tool | AMSTAR-2 Quality | Remarks          |
|----------------------------------|----------------------|-------------------|------------|----------------|------------|-----------|----------------|--------|-------------|-------------------|-------|----------------|------------------|------------------|
| 45 (Hosen et al. 2021) [61]      | 4                    | Anxiety           | All        | 4              | 52         | 32–71     | 96             | 883    | 1699        | STATA             | REM   | JBI            | Low              | Mixed/Bangladesh |
|                                  |                      | Depression        | All        | 4              | 41         | 35–46     | 62.1           | 697    | 1699        |                   |       |                |                  |                  |
| 46 (Norhayati et al. 2021) [68]  | 80                   | Stress            | All        | 20             | 31.7       | 21.3–42.2 | 98             | 4017   | 12673       | Rev               | REM   | JBI            | Low              | HCPs/Asia        |
|                                  |                      | Anxiety           | All        | 68             | 34.8       | 30.1–38.8 | 100            | 43474  | 124925      |                   |       |                |                  |                  |
|                                  |                      |                   | Nurses     | 18             | 36.1       | 23.8–48.4 | 100            | 4178   | 11574       |                   |       |                |                  |                  |
|                                  |                      |                   | Physicians | 18             | 30.1       | 20.6–39.6 | 99             | 2191   | 7279        |                   |       |                |                  |                  |
|                                  |                      | Depression        | All        | 60             | 34.6       | 30.9–38.4 | 100            | 45779  | 132308      |                   |       |                |                  |                  |
|                                  |                      |                   | Nurses     | 19             | 36.6       | 27.1–46.2 | 99             | 3718   | 10159       |                   |       |                |                  |                  |
|                                  |                      |                   | Physicians | 19             | 28.3       | 18.9–37.8 | 99             | 1937   | 6845        |                   |       |                |                  |                  |
|                                  |                      | Sleep Disturbance | All        | 12             | 37.9       | 25.4–50.4 | 100            | 5638   | 14877       |                   |       |                |                  |                  |
| 47 (Zhao et al. 2021) [83]       |                      | Stress            | All        | 5              | 28         | 9.5–59    | 99             | 1212   | 4327        | CMA               | REM   | Loney          | Low              | Mixed            |
|                                  |                      | Anxiety           | All        | 14             | 23.        | 17.1–30.8 | 98             | 2995   | 13020       |                   |       |                |                  |                  |
|                                  |                      | Depression        | All        | 11             | 23.9       | 15–35.9   | 99             | 2849   | 11922       |                   |       |                |                  |                  |
| 48 (Thakur and Pathak 2021) [78] | 20                   | Stress            | All        | 3              | 55.6       | 36–110    | 99             | 1356   | 2438        |                   | REM   | NOS            | Low              | HCPs /Frontline  |
|                                  |                      | Anxiety           | All        | 10             | 27.2       | 18.1–36.3 | 98             | 3229   | 11873       |                   |       |                |                  |                  |
|                                  |                      | Depression        | All        | 9              | 32         | 18–46     | 99             | 3604   | 11262       |                   |       |                |                  |                  |
|                                  |                      | Sleep Disturbance | All        | 3              | 34.4       | 32.5–36.3 | 99             | 1296   | 3768        |                   |       |                |                  |                  |
| 49 (Aymereich et al. 2022) [84]  | 239                  | Stress            | All        | 57             | 40         | 32–47     | 99.87          | 19217  | 48042       | STATA             | REM   | NOS            | Low              | HCPs             |
|                                  |                      | Anxiety           | All        | 176            | 42         | 35–48     | 99.94          | 86735  | 206513      |                   |       |                |                  |                  |
|                                  |                      | Depression        | All        | 160            | 33         | 28–38     | 99.95          | 69551  | 210762      |                   |       |                |                  |                  |
|                                  |                      | Sleep Disturbance | All        | 55             | 42         | 36–48     | 99.57          | 15569  | 37068       |                   |       |                |                  |                  |
| 50 (Hu et al. 2022) [86]         | 71                   | Anxiety           | All        | 60             | 26.7       | 19.6–34.6 | 100            | 20558  | 76998       | R                 | REM   | JBI            | Low              | HCPs/China       |
|                                  |                      | Depression        | All        | 56             | 28.7       | 19.6–34.6 | 100            | 25655  | 89390       |                   |       |                |                  |                  |

(Continued)

Table 1. (Continued)

| Study                               | Total Study Included | Outcome           | Population | Study Included | Prevalence | 95% CI    | I <sup>2</sup> | Events | Sample size | Analysis Software | Model | Appraisal Tool | AMSTAR-2 Quality | Remarks          |
|-------------------------------------|----------------------|-------------------|------------|----------------|------------|-----------|----------------|--------|-------------|-------------------|-------|----------------|------------------|------------------|
|                                     |                      | Sleep Disturbance | All        | 25             | 40.4       | 33.8–47.2 | 99             | 10883  | 26937       |                   |       |                |                  |                  |
| 51 (Johns et al. 2022) [88]         | 55                   | Anxiety           | Physicians | 30             | 25.8       | 20.4–31.5 | 99.2           | 8586   | 33281       | R                 | REM   | JB1            | Low              | Physicians       |
|                                     |                      | Depression        | Physicians | 26             | 20.5       | 16–25.3   | 98.9           | 6447   | 31447       |                   |       |                |                  |                  |
| 52 (Li et al. 2022) [89]            | 48                   | Sleep Disturbance | All        | 48             | 46.4       | 40.3–52.5 | 99.5           | 15322  | 33021       | STATA             | REM   | AHRQ           | Low              | Mixed/China      |
| 53 (Rezaei et al. 2022) [90]        | 24                   | Depression        | All        | 24             | 26         | 18–35     |                | 10923  | 42010       | R                 | REM   | NOS            | Low              | HCPs             |
| 54 (Xiong et al. 2022) [93]         | 44                   | Stress            | All        | 7              | 27         | 16–38     | 99.8           | 7330   | 27148       | STATA             | REM   | AHRQ           | Low              | HCPs/China       |
|                                     |                      | Anxiety           | All        | 18             | 17         | 13–21     | 99.5           | 5915   | 34793       |                   |       |                |                  |                  |
|                                     |                      | Depression        | All        | 15             | 15         | 13–16     | 94.3           | 7293   | 48621       |                   |       |                |                  |                  |
|                                     |                      | Sleep Disturbance | All        | 5              | 15         | 7–23      | 99             | 857    | 5711        |                   |       |                |                  |                  |
| 55 (Zhang et al. 2022) [94]         | 88                   | Anxiety           | All        | 88             | 33.6       | 29.7–37.6 | 99.2           | 25222  | 75066       | STATA             | REM   | STROBE         | Low              | HCPs             |
| 56 (Slusarska et al. 2022) [91]     | 23                   | Anxiety           | Nurses     | 22             | 29         | 18–40     | 99.9           | 12488  | 43062       | R                 | REM   | AHRQ           | Low              | HCPs             |
|                                     |                      | Depression        | Nurses     | 18             | 22         | 15–30     | 99.7           | 8675   | 39430       |                   |       |                |                  |                  |
| 57 (Blasco-Belled et al. 2022) [85] | 74                   | Stress            | All        | 24             | 32         | 23–42     | 100            | 8122   | 25382       | MetaXL            | REM   | JB1            | Moderate         | Mixed            |
|                                     |                      | Anxiety           | All        | 66             | 31         | 27–36     | 99             | 22309  | 71966       |                   |       |                |                  |                  |
|                                     |                      | Depression        | All        | 60             | 31         | 26–35     | 99             | 26269  | 84740       |                   |       |                |                  |                  |
| 58 (Huang et al. 2022) [87]         | 17                   | Stress            | All        | 3              | 17         | 4–34      | 85             | 45     | 265         | CMA               | REM   | Hoy's          | Low              | HCPs/ Frontline  |
|                                     |                      | Anxiety           | All        | 16             | 32         | 20–44     | 98             | 2494   | 7795        |                   |       |                |                  |                  |
|                                     |                      | Depression        | All        | 14             | 31         | 21–41     | 97             | 2326   | 7504        |                   |       |                |                  |                  |
| 59 (Tran et al. 2022) [92]          | 7                    | Depression        | All        | 7              | 17.3       | 9.2–27.3  | 100            | 1555   | 8987        | CMA               | REM   | JB1            | Low              | HCPs/ Vietnam    |
| 60 (Tong et al. 2022) [105]         | 19                   | Stress            | All        | 10             | 53         | 41.1–64.9 | 78.3           | 3167   | 5976        | R                 | REM   | NOS            | Moderate         | HCPs             |
|                                     |                      | Anxiety           | All        | 19             | 43         | 33.8–52.3 | 99             | 7316   | 17013       |                   |       |                |                  |                  |
|                                     |                      | Depression        | All        | 19             | 44.6       | 36.1–53.1 | 99             | 7588   | 17013       |                   |       |                |                  |                  |
|                                     |                      | Sleep Disturbance | All        | 16             | 42.9       | 33.9–51.9 | 99             | 6612   | 15413       |                   |       |                |                  |                  |
| 61 (Andhavarapu et al. 2022) [96]   | 119                  | Stress            | All        | 119            | 34         | 30–39     | 90             | 39829  | 117143      | CMA               | REM   | NOS            | Moderate         | HCPs             |
| 62 (Mamun et al. 2022) [103]        | 4                    | Sleep Disturbance | All        | 4              | 51         | 23–79     | 98             | 575    | 1127        | STATA             | REM   | JB1            | Moderate         | HCPs/ Bangladesh |

(Continued)

Table 1. (Continued)

| Study                                  | Total Study Included | Outcome           | Population | Study Included | Prevalence | 95% CI    | I <sup>2</sup> | Events | Sample size | Analysis Software | Model | Appraisal Tool | AMSTAR-2 Quality | Remarks       |
|----------------------------------------|----------------------|-------------------|------------|----------------|------------|-----------|----------------|--------|-------------|-------------------|-------|----------------|------------------|---------------|
| 63 (Cheung et al. 2022) [98]           | 6                    | Anxiety           | All        | 6              | 37.8       | 28.7–46.9 | 96             | 1230   | 3253        | STATA             | REM   | JBI            | Moderate         | HCPs/Asia     |
|                                        |                      | Depression        | All        | 6              | 39.8       | 29–50.5   | 97             | 1295   | 3253        |                   |       |                |                  |               |
| 64 (Hasen et al. 2023b) [100]          | 8                    | Depression        | All        | 7              | 40         | 23–57     | 99             | 1101   | 2752        | STATA             | REM   | NOS            | Moderate         | HCPs/Ethiopia |
|                                        |                      | Sleep Disturbance | All        | 3              | 37         | 13–58     | 98             | 334    | 904         |                   |       |                |                  |               |
| 65 (Athe et al. 2023) [97]             | 11                   | Stress            | All        | 6              | 50.4       | 22.6–78.2 | 99             | 585    | 1161        | RevMan            | REM   |                | Critically Low   | HCPs/India    |
|                                        |                      | Anxiety           | All        | 10             | 42.9       | 30.3–55.5 | 98             | 1302   | 3036        |                   |       |                |                  |               |
|                                        |                      | Depression        | All        | 8              | 35.4       | 24.5–46.3 | 97             | 1114   | 3147        |                   |       |                |                  |               |
| 66 (Sialakis et al. 2023) [107]        | 14                   | Anxiety           | All        | 14             | 41.4       | 30.3–52.9 | 99             | 3221   | 7780        | MedCalc           | REM   | JBI            | Moderate         | HCPs          |
|                                        |                      | Depression        | All        | 14             | 33.8       | 24.7–43.6 | 98             | 2630   | 7780        |                   |       |                |                  |               |
| 67 (Gheshlagh et al. 2023) [99]        | 12                   | Anxiety           | All        | 12             | 23         | 18–27     | 98             | 6891   | 29960       | STATA             | REM   | NOS            | Moderate         | HCPs/Asia     |
|                                        |                      | Depression        | All        | 11             | 20         | 14–27     | 99             | 5890   | 29448       |                   |       |                |                  |               |
| 68 (Wang et al. 2023) [106]            | 14                   | Stress            | Nurses     | 14             | 65.4       | 55.9–79.9 | 99             | 13902  | 21257       | STATA             | REM   | NOS            | Moderate         | HCPs          |
| 69 (Khobragade and Agrawal 2023) [101] | 39                   | Stress            | All        | 23             | 43         | 30–56     | 99             | 3494   | 8125        | R                 | REM   | NOS            | Critically Low   | HCPs/India    |
|                                        |                      | Sleep Disturbance | All        | 16             | 35         | 28–44     | 97             | 1741   | 4974        |                   |       |                |                  |               |
| 70 (Lee et al. 2023) [102]             |                      | Stress            | All        | 107            | 25.5       | 22.5–28.6 | 100            | 47070  | 184588      | R                 | REM   | JBI            | Moderate         | HCPs          |
|                                        |                      |                   | Nurses     | 42             | 27.4       | 22.5–32.5 | 99             | 10016  | 36554       |                   |       |                |                  |               |
|                                        |                      |                   | Physicians | 42             | 22.4       | 16.4–29.1 | 99             | 5635   | 25155       |                   |       |                |                  |               |
|                                        |                      | Anxiety           | All        | 272            | 28.7       | 26.5–31   | 99             | 84831  | 295578      |                   |       |                |                  |               |
|                                        |                      |                   | Nurses     | 85             | 31.5       | 26.9–36.3 | 99             | 22899  | 72695       |                   |       |                |                  |               |
|                                        |                      |                   | Physicians | 81             | 26.9       | 23–31     | 98             | 10072  | 37443       |                   |       |                |                  |               |
|                                        |                      | Depression        | All        | 274            | 28.5       | 26.5–30.7 | 99             | 94019  | 329891      |                   |       |                |                  |               |
|                                        |                      |                   | Nurses     | 98             | 28         | 24.5–31.7 | 99             | 24327  | 86881       |                   |       |                |                  |               |

(Continued)

Table 1. (Continued)

| Study                         | Total Study Included | Outcome           | Population | Study Included | Prevalence | 95% CI    | I <sup>2</sup> | Events | Sample size | Analysis Software | Model | Appraisal Tool | AMSTAR-2 Quality | Remarks       |
|-------------------------------|----------------------|-------------------|------------|----------------|------------|-----------|----------------|--------|-------------|-------------------|-------|----------------|------------------|---------------|
|                               |                      |                   | Physicians | 89             | 25.3       | 21.8–29   | 99             | 10417  | 41175       |                   |       |                |                  |               |
|                               |                      | Sleep Disturbance | All        | 54             | 24.4       | 19.4–29.9 | 99             | 7536   | 30886       |                   |       |                |                  |               |
|                               |                      |                   | Nurses     | 14             | 26         | 16–37.3   | 99             | 1644   | 6324        |                   |       |                |                  |               |
|                               |                      |                   | Physicians | 15             | 16         | 10.2–22.7 | 95             | 632    | 3948        |                   |       |                |                  |               |
| 71 (Sharma et al. 2023) [104] |                      | Stress            | All        | 22             | 36         | 23.7–48.2 | 99             | 2875   | 7985        | R                 | OMA   | JB1            | Moderate         | HCPs/India    |
|                               |                      | Anxiety           | All        | 20             | 25         | 18.4–31.6 | 98             | 1953   | 7811        |                   |       |                |                  |               |
|                               |                      | Depression        | All        | 21             | 20.1       | 15.6–24.6 | 97             | 2055   | 10222       |                   |       |                |                  |               |
|                               |                      | Sleep Disturbance | All        | 6              | 18.9       | 9.9–28    | 95             | 296    | 1565        |                   |       |                |                  |               |
| 72 (Hasen et al. 2023a) [108] | 13                   | Stress            | All        | 9              | 51         | 41–62     | 98             | 1929   | 3815        | STATA             | REM   | NOS            | Moderate         | HCPs/Ethiopia |
|                               |                      | Anxiety           | All        | 8              | 46         | 30–61     | 99             | 1802   | 3703        |                   |       |                |                  |               |

National Institutes of Health; NIH; Joanna Briggs Institute (JBI); OMA: Open Meta Analyst;GRADE: Grading of Recommendations Assessment, Development and Evaluations; NOS: Newcastle–Ottawa Scale; AHRQ: Agency for Healthcare Research and Quality; MMAT: Mixed Methods Appraisal Tool; MU: McMaster University; SAQOR: Systematic Assessment of Quality in Observation Research; CMA: Comprehensive Meta-Analysis software; HCPs: Healthcare Professionals.

<https://doi.org/10.1371/journal.pone.0302597.t001>



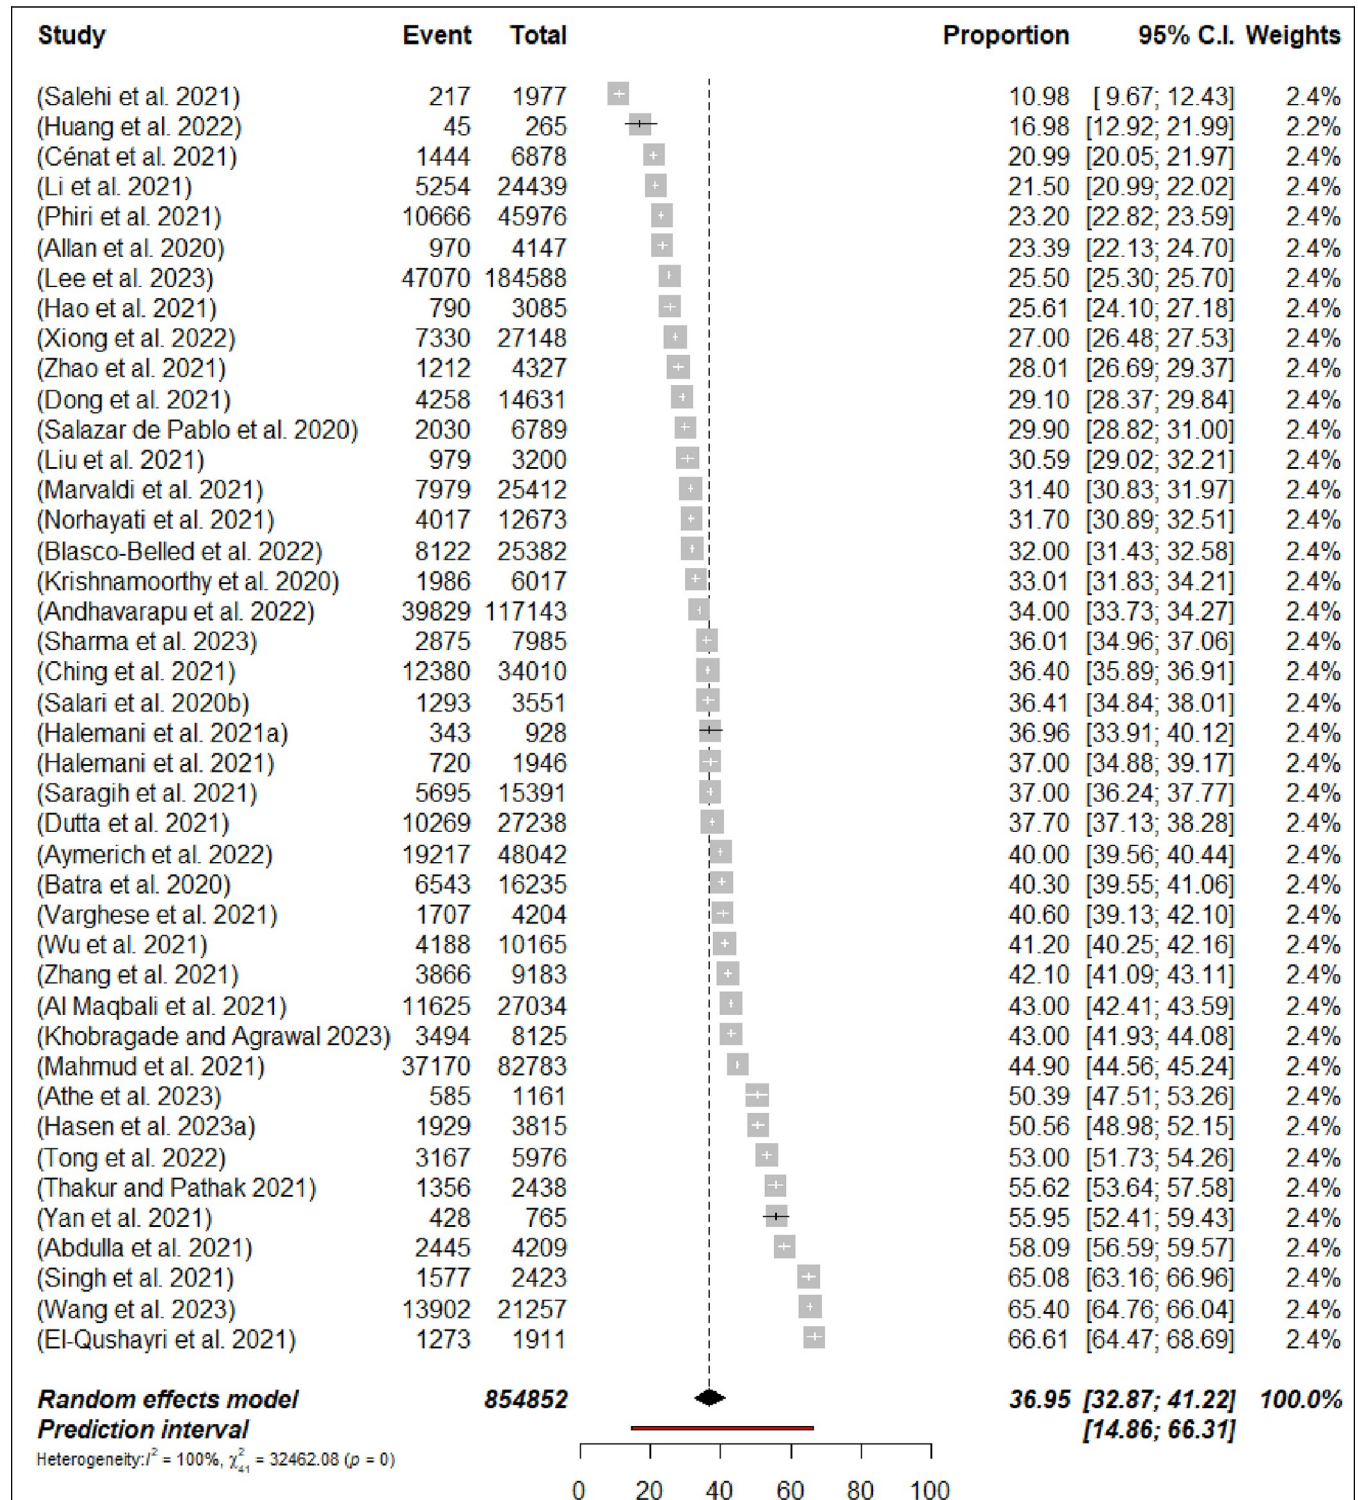

Fig 2. Forest plot of the prevalence of stress among HCPs stress (N = 42).

<https://doi.org/10.1371/journal.pone.0302597.g002>

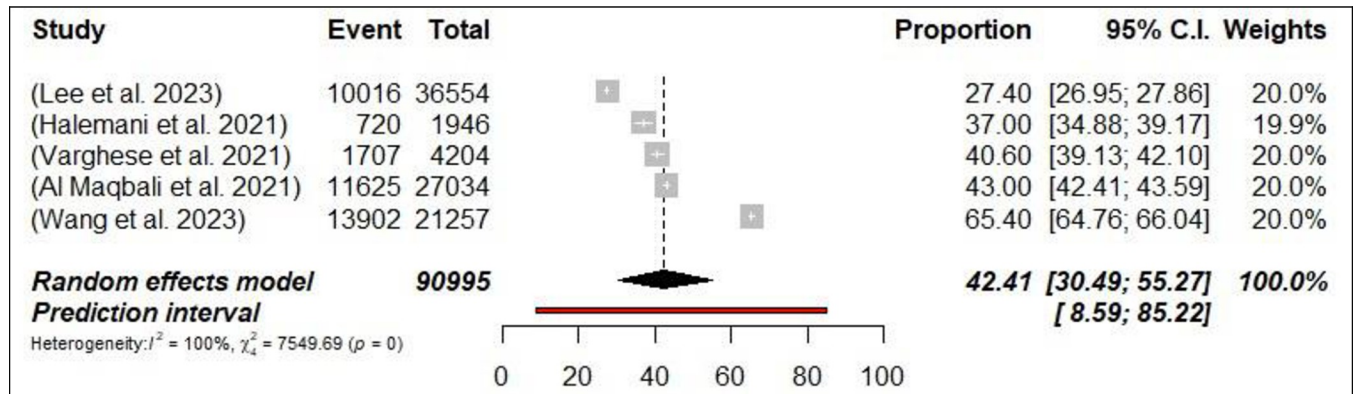

Fig 3. Forest plot of the prevalence of stress among nurses (N = 5).

<https://doi.org/10.1371/journal.pone.0302597.g003>

one-out analysis, revealed that none of the meta-analyses had an impact on the global prevalence estimate of anxiety symptoms greater than 1%. Suggestive evidence (class III) was found for the estimated prevalence of anxiety in the case of HCPs, nurses and physicians.

### 3.5 Prevalence of depression

A total of 54 meta-analyses examined the prevalence of depression among HCPs during the COVID-19 pandemic and results ranged from 14% [52] to 65.6% [58]. The pooled prevalence was 29.4% (698,808/2,349,613 participants, 95% CI 27.13–31.84) with 95% PI: 15.01–49.62 (Fig 7: Forest Plots) and there was a significant result in terms of the study heterogeneity ( $p < 0.0001$ ,  $I^2 = 99.9\%$ ). In subgroups analyses, the prevalence of depression was higher among nurses 32% ( $n = 11$ ; 95% CI = 28–36.35,  $I^2 = 99\%$ ) compared with physicians 28.4% ( $n = 8$ ; 95% CI = 24.32–32.78,  $I^2 = 99\%$ ) (Figs 8 and 9: Forest Plots). In the sensitivity analysis, the pooled prevalence remained stable when one meta-analysis was excluded at a time, with

Table 2. Level of evidence for the prevalence of symptoms among HCPs.

|                   | No | Total   | Event  | Prevalence % | Random effects (95% CI) | Random effects p-value | 95% Prediction Interval | $I^2$ , % | Egger Test | Begg | Class of Evidence | Sensitivity Analysis |
|-------------------|----|---------|--------|--------------|-------------------------|------------------------|-------------------------|-----------|------------|------|-------------------|----------------------|
| <b>Stress</b>     |    |         |        |              |                         |                        |                         |           |            |      |                   |                      |
| HCPs              | 42 | 854852  | 292245 | 37           | 32.87–41.22             | <0.0001                | 14.86–66.3              | 99.9      | 0.19       | 0.79 | III               | ± 2%                 |
| Nurses            | 5  | 90995   | 37970  | 42.4         | 30.49–55.27             | <0.0001                | 8.59–85.22              | 99.9      | 0.87       | 1    | III               | ± 3%                 |
| <b>Anxiety</b>    |    |         |        |              |                         |                        |                         |           |            |      |                   |                      |
| HCPs              | 55 | 2310774 | 734036 | 31.8         | 29.2–34.61              | <0.0001                | 15.24–54.83             | 99.9      | 0.23       | 0.53 | III               | ± 1%                 |
| Nurses            | 12 | 321415  | 105438 | 31.6         | 28.33–35.14             | <0.0001                | 19.54–46.86             | 99.6      | 0.31       | 0.58 | III               | ± 1%                 |
| Physician         | 9  | 160937  | 43219  | 26.3         | 22.89–30.10             | <0.0001                | 14.98–42.05             | 99.2      | 0.65       | 1    | III               | ± 1%                 |
| <b>Depression</b> |    |         |        |              |                         |                        |                         |           |            |      |                   |                      |
| HCPs              | 54 | 2349613 | 698808 | 29.4         | 27.13–31.84             | <0.0001                | 15.01–49.62             | 99.9      | 0.16       | 0.84 | III               | ± 0.5%               |
| Nurses            | 11 | 305385  | 96564  | 32           | 28–36.35                | <0.0001                | 17.98–50.34             | 99.8      | 0.82       | 0.94 | III               | ± 1%                 |
| Physician         | 8  | 154935  | 43268  | 28.4         | 24.32–32.78             | <0.0001                | 15.37–46.32             | 99.8      | 0.98       | 0.62 | III               | ± 1%                 |
| <b>Sleep</b>      |    |         |        |              |                         |                        |                         |           |            |      |                   |                      |
| HCPs              | 36 | 502780  | 191673 | 36.9         | 33.78–40.05             | <0.0001                | 19.99–57.70             | 99.7      | 0.24       | 0.04 | III               | ± 1%                 |
| Nurses            | 5  | 50797   | 19285  | 37.1         | 30.71–44.1              | <0.0001                | 30.71–44.06             | 99.3      | 0.33       | 0.61 | III               | ± 2%                 |
| Physician         | 4  | 12976   | 4138   | 30.6         | 20.04–43.77             | <0.0001                | 2.68–87–62              | 99.5      | 0.48       | 1    | III               | ± 3%                 |

<https://doi.org/10.1371/journal.pone.0302597.t002>

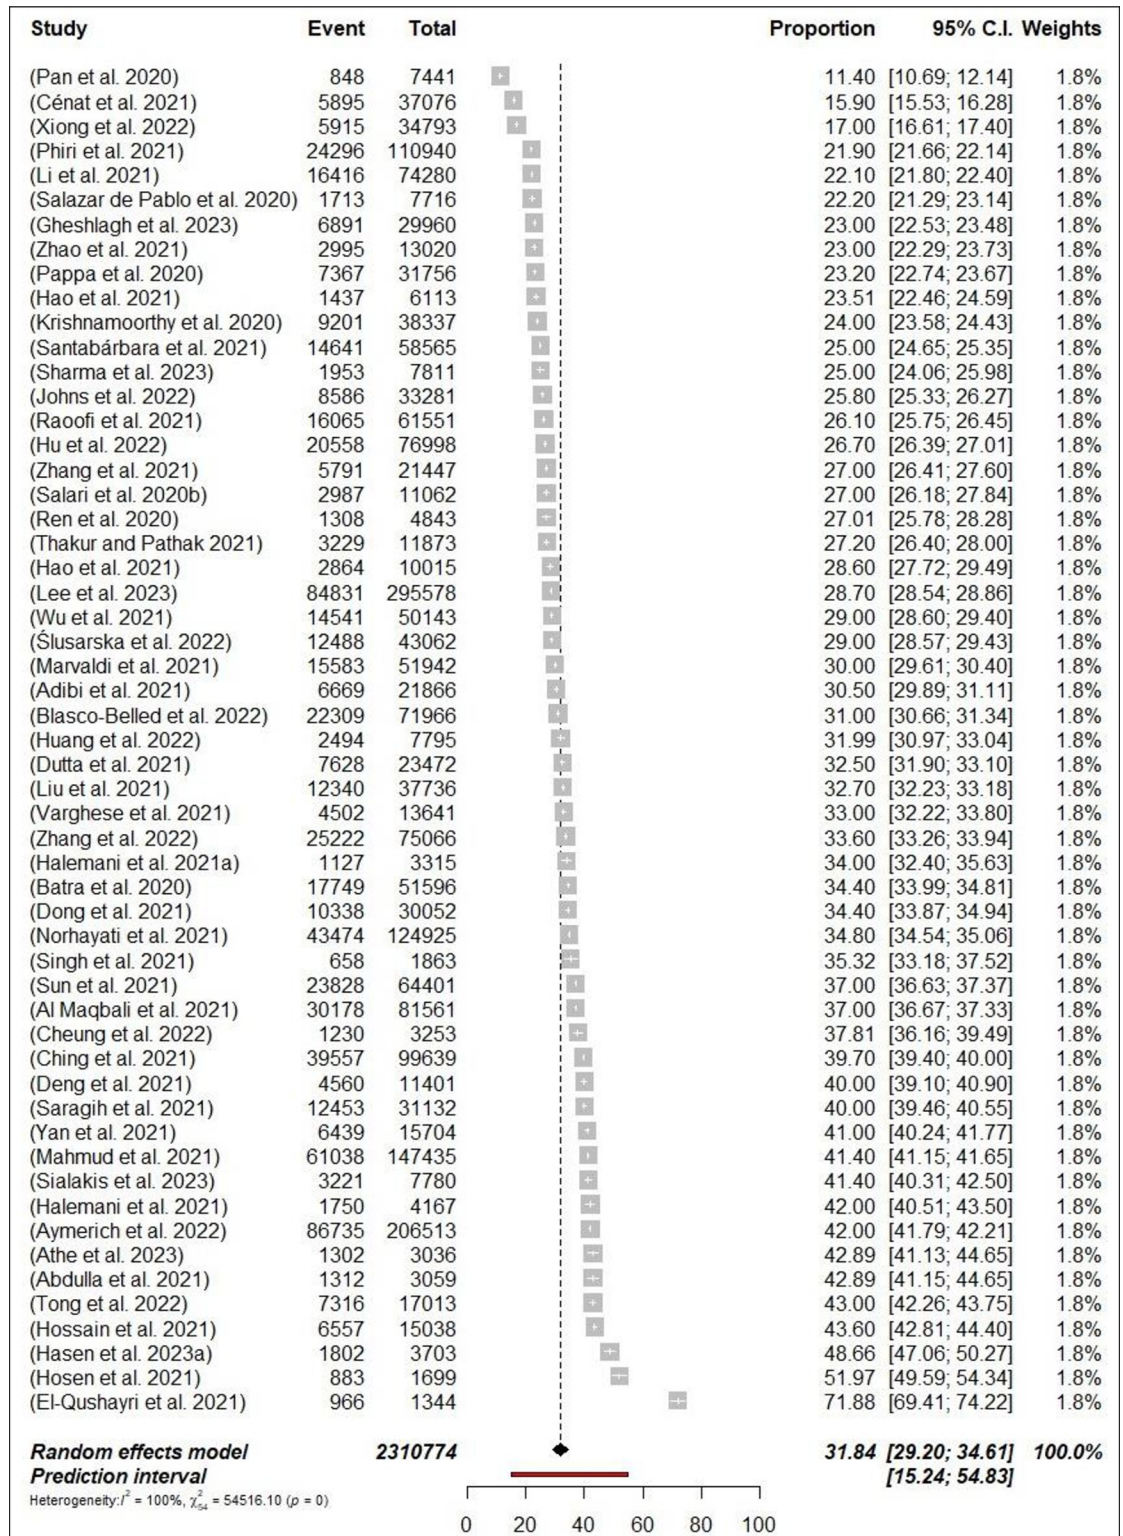

Fig 4. Forest plot of the prevalence of anxiety among HCPs (N = 55).

<https://doi.org/10.1371/journal.pone.0302597.g004>

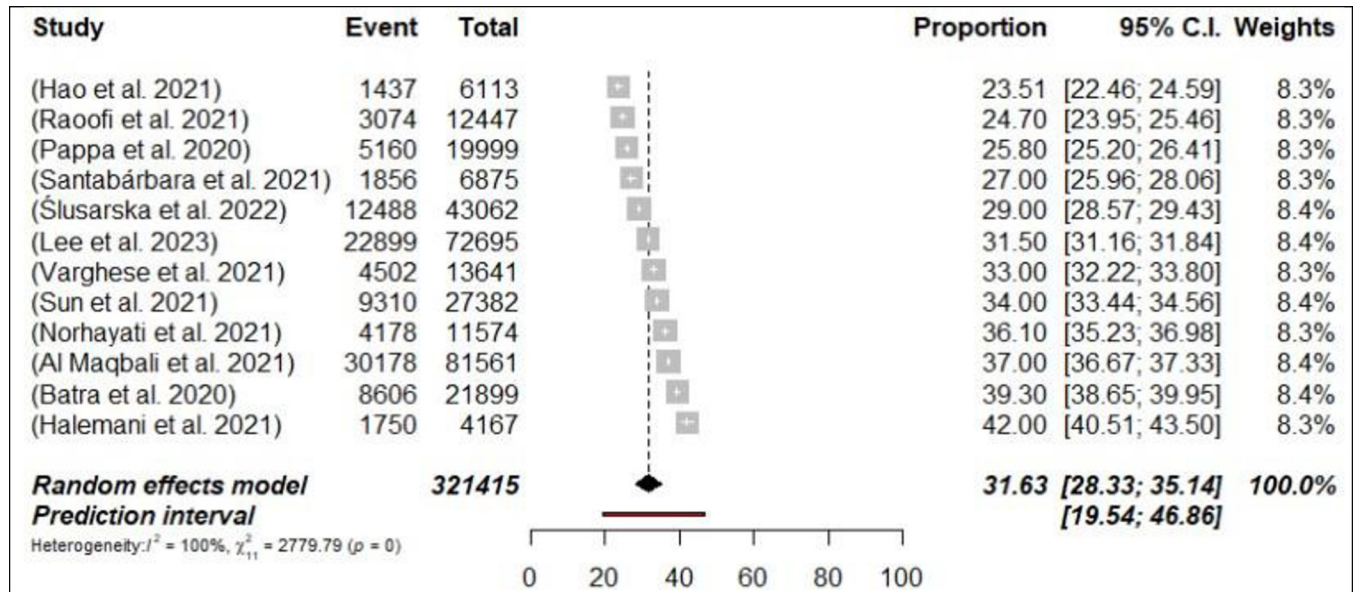

Fig 5. Forest plot of the prevalence of anxiety among nurses (N = 12).

<https://doi.org/10.1371/journal.pone.0302597.g005>

variations of less than 1%. Class III evidence revealed suggestive findings regarding the estimated prevalence of depression among HCPs, nurses, and physicians.

### 3.6 Prevalence of sleep disturbance

Sleep disturbance was assessed in 36 meta-analyses, with a calculated pooled prevalence of 36.9% (191,673/502,780 participants, 95% CI 33.78–40.05) with 95% PI: 19.99–57.70 (Fig 10: Forest Plots) with significant differences in terms of the meta-analyses heterogeneity presented ( $p < 0.0001$ ,  $I^2 = 99.7\%$ ). The prevalence of sleep disturbance ranged from 15.01% [93] to 47.3% [95]. In subgroup analyses, the prevalence of sleep disturbance was found to be higher among nurses at 37.1% ( $n = 5$ ; 95% CI = 30.71–44.1,  $I^2 = 99\%$ ) compared to physicians, where

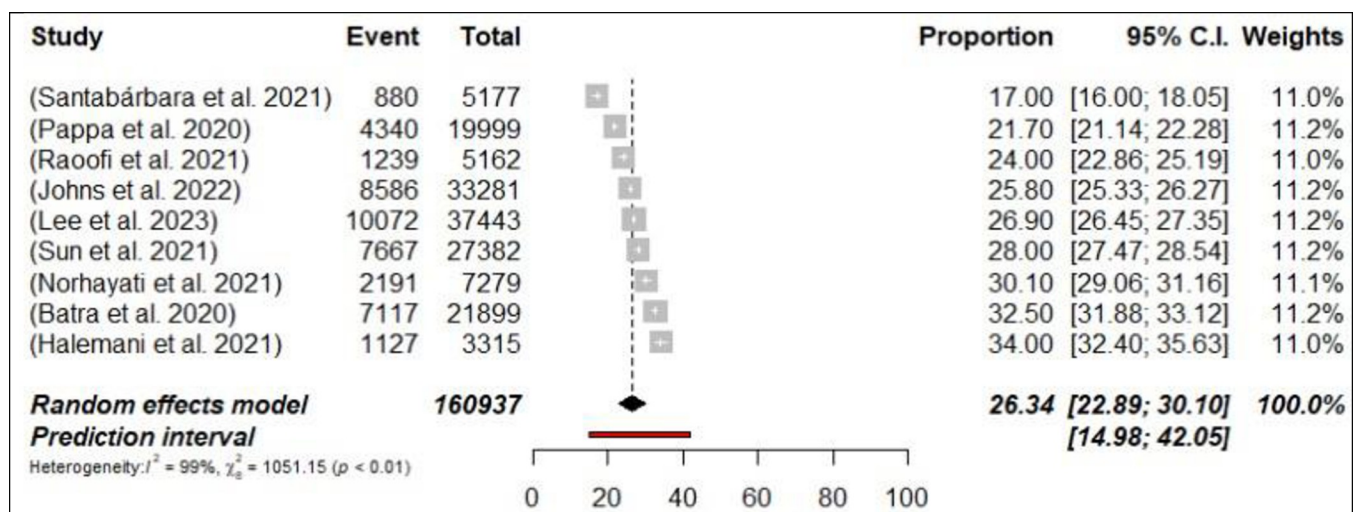

Fig 6. Forest plot of the prevalence of anxiety among physicians (N = 9).

<https://doi.org/10.1371/journal.pone.0302597.g006>

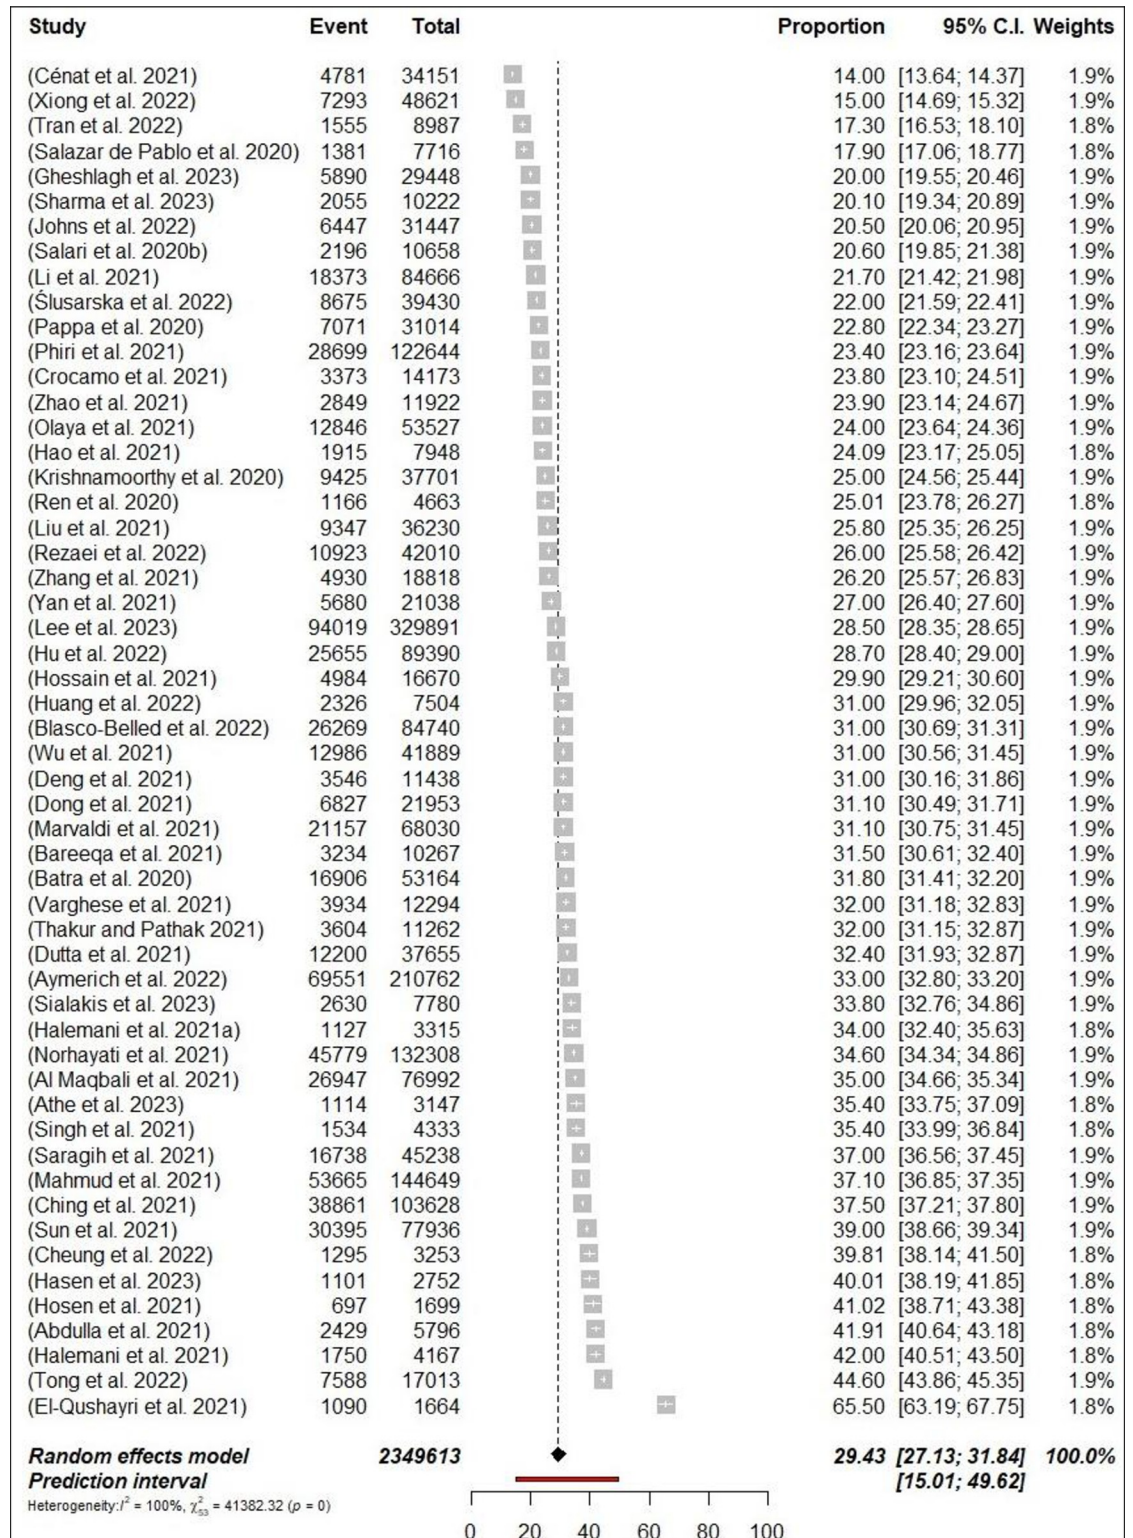

Fig 7. Forest plot of the prevalence of depression among HCPs (N = 54).

<https://doi.org/10.1371/journal.pone.0302597.g007>

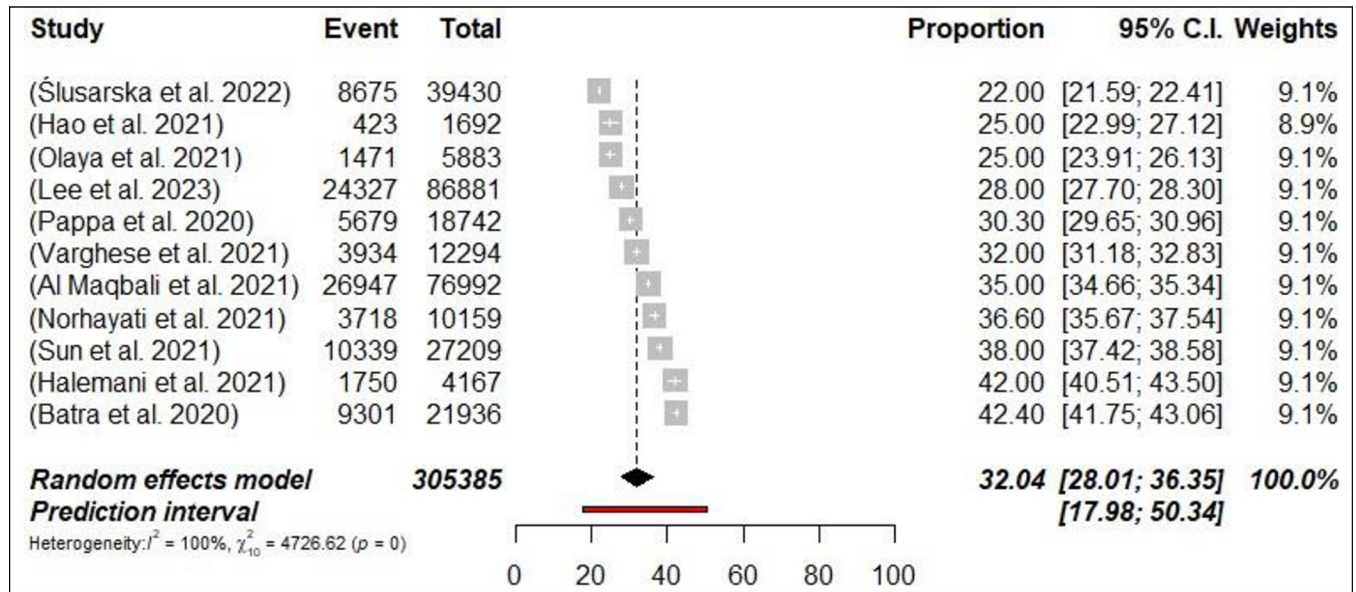

Fig 8. Forest plot of the prevalence of depression among nurses (N = 11).

<https://doi.org/10.1371/journal.pone.0302597.g008>

it was 30.6% (n = 4; 95% CI = 20.04–43.77,  $I^2 = 99\%$ ) (Figs 11 and 12: Forest Plots). The estimated prevalence rate of sleep disturbance was deemed to be suggestive evidence (Class III). The pooled prevalence did not change in sensitivity analysis by excluding one meta-analyses each time by less than 3%.

### 3.7 Publication bias

The result of Egger’s regression test for all pooled prevalence indicates that publication bias was insignificant, showing no evidence of publication bias Table 2.

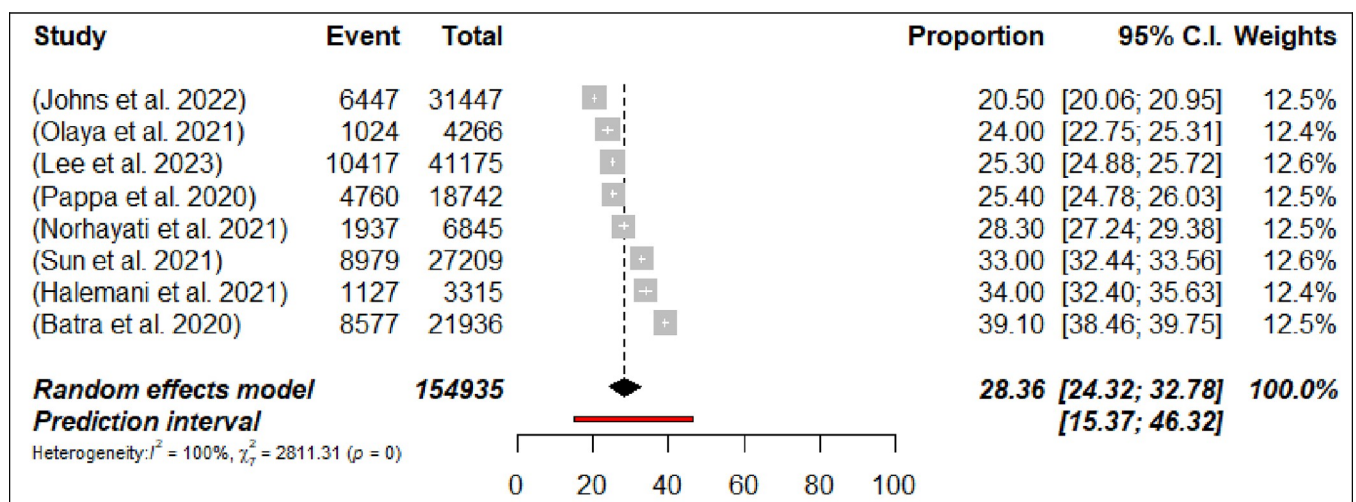

Fig 9. Forest plot of the prevalence of depression among physicians (N = 8).

<https://doi.org/10.1371/journal.pone.0302597.g009>

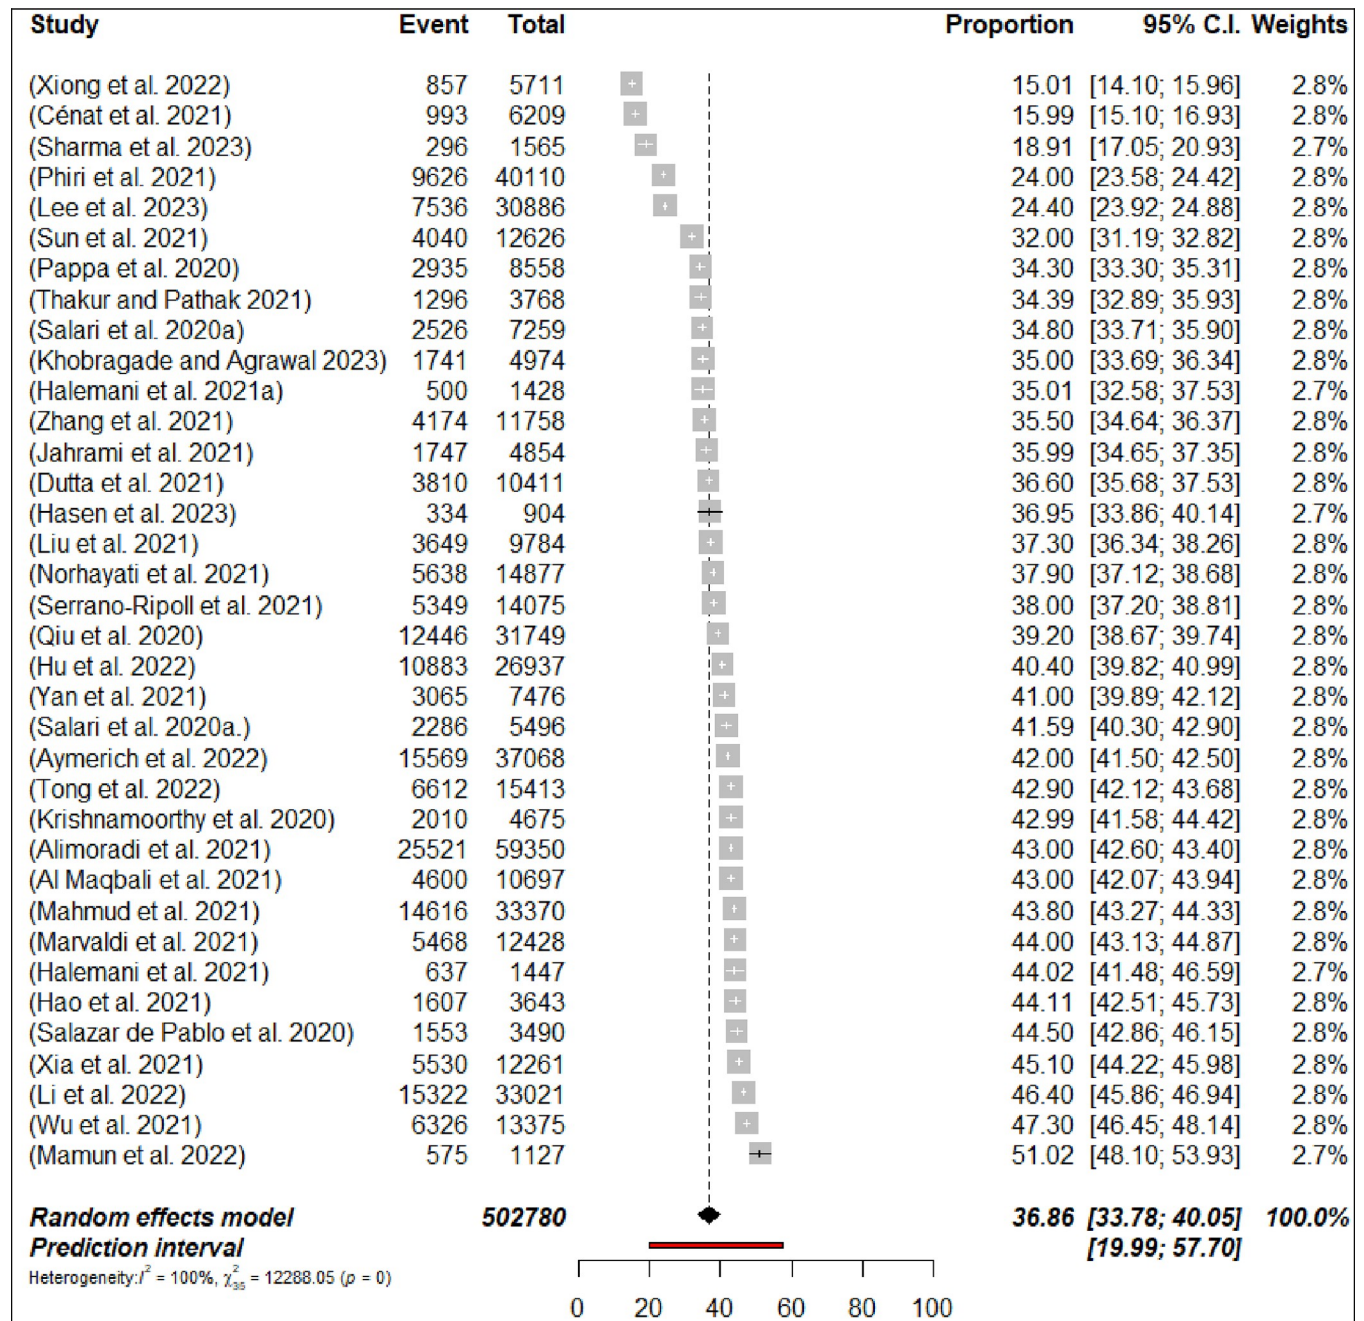

Fig 10. Forest plot of the prevalence of sleep disturbance among HCPs (N = 36).

<https://doi.org/10.1371/journal.pone.0302597.g010>

### 4. Discussion

To the best of our knowledge, this is the first umbrella review to provide a comprehensive synthesis of the estimate of the aggregate data prevalence symptoms of stress, anxiety, depression, and sleep disturbance among HCPs, physicians, and nurses during the entire COVID-19 pandemic.

In the present umbrella review, which utilizes aggregate data from 71 meta-analyses, the most prevalent problems among healthcare professionals (HCPs) were found to be stress

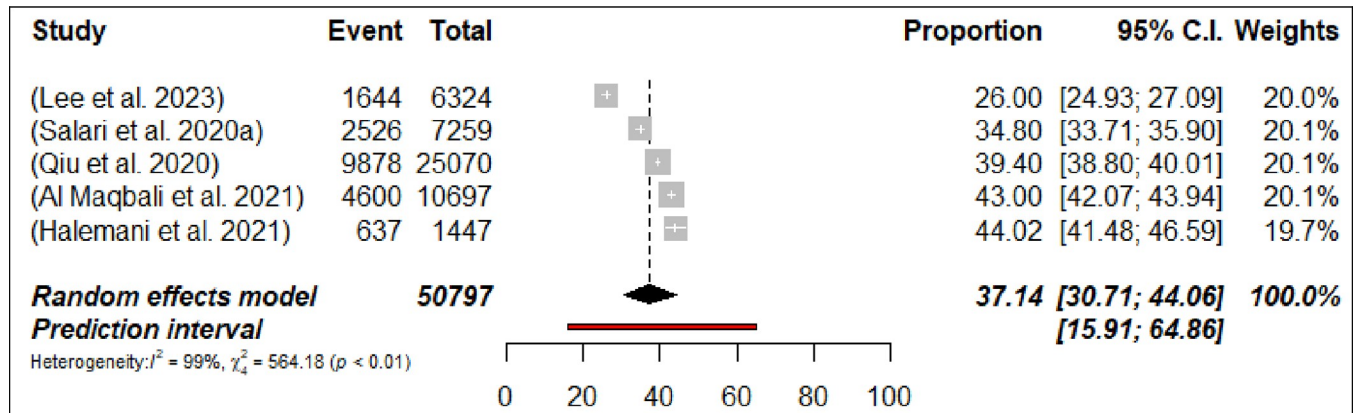

Fig 11. Forest plot of the prevalence of sleep disturbance among nurses (N = 5).

<https://doi.org/10.1371/journal.pone.0302597.g011>

(37%), followed by sleep disturbance (36.9%), anxiety (31.8%), and depression (29.4%). The findings among HCPs are slightly higher than the prevalence estimates from the general population (prevalence estimates of 27% for sleep disturbance; 36% for stress; 26% for anxiety and 28% for depression) during the COVID-19 pandemic [109]. In addition, a report by the World Health Organization prior to the COVID-19 pandemic estimated that the global prevalence of anxiety and depression was 4.4% and 3.6% respectively [110]. While some of this disparity may result from different methodological approaches used, the prevalence of depression and anxiety during the COVID-19 pandemic appears to have been higher than before the outbreak. The rise in mental health problems among HCPs may have been triggered by the uncertainty surrounding the pandemic, increased workload, and the fear of family transmission, any, or all of which may also contribute to the higher prevalence of these conditions.

The results of this umbrella review revealed higher prevalence rates compared with two previous reviews of meta-analyses [18,20]. These include 10 meta-analyses which reported prevalence rates during COVID-19 among HCPs: 25% for anxiety and 24% for depression [18]. Another umbrella review involving 18 meta-analyses found stress in 36% of the sample, depression in 26%, anxiety in 27% and sleep disturbance in 32% among HCPs during the COVID-19 pandemic [20]. It is important to highlight that the previous reviews included meta-analyses published before March 2021, while this current review included studies published until January 2024. As a result, the current umbrella review includes more meta-analyses

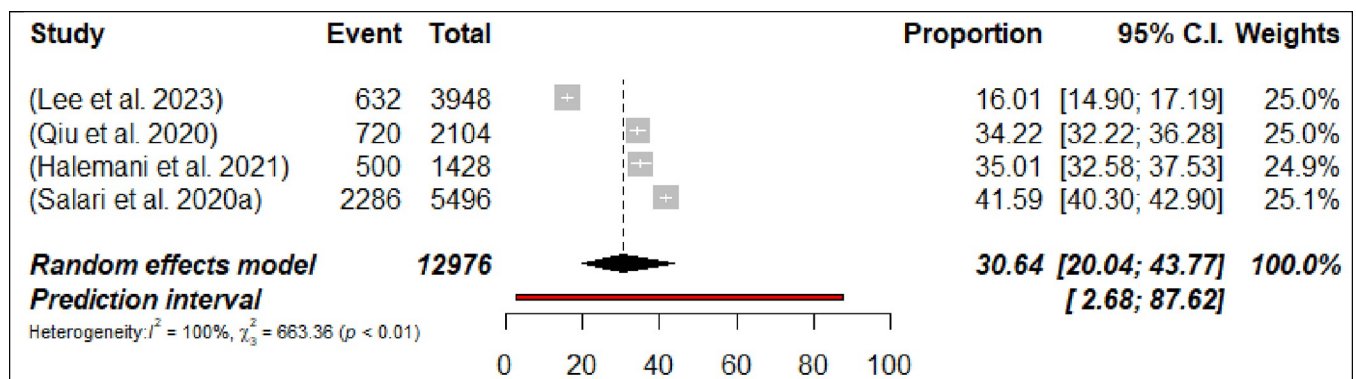

Fig 12. Forest plot of the prevalence of sleep disturbance among physicians (N = 4).

<https://doi.org/10.1371/journal.pone.0302597.g012>



compared to the two previous umbrella reviews [18,20]. This umbrella review therefore extends the scientific knowledge of the impact of COVID on mental health of HCPs.

The results of our study suggest that the psychological trauma experienced by HCPs during the SARS and MERS epidemics was lower than that experienced during the COVID-19 pandemic [111–114]. However, the difference between COVID-19 and previous pandemics could be explained by the high mortality rate and infectious potential of the COVID-19 pandemic. The results of this study suggest that the COVID-19 pandemic has had a significant negative effect on the psychological health of HCPs. One important lesson that should be learned is that early detection and treatment are carried out to prevent these types of psychological issues developing into more complex ones.

The result of this analysis demonstrates a higher level of anxiety, depression and sleep disturbance among nurses compared to physicians. One explanation for this may be that nurses are involved in more prolonged and closer contact to COVID-19 patients than physicians [115–117]. Another possible reason might be due to the higher number of nurses included in original studies.

The current review found that the overall pooled prevalence varied between the meta-analyses, for example ranging between 1% [72] and 66.6% [58] for stress, 11.% [40] and 71.9% [58] for anxiety, 14% [52] and 65.6% [58] for depression, and 15% [93] and 47.3% [95] for sleep disturbance. This could be linked to the varying COVID-19 infection and mortality rates in the countries in which the studies were conducted. Other possible reasons might relate to the healthcare system, cultural norms of HCPs, and their perceptions of stress, anxiety, depression, and sleep disturbance which in turn might be influenced by their working conditions, exposure to pandemics, intensity of lockdown and social distancing strategies, and perceived support. For instance, the result of the meta-analysis by El-Qushayri [58] showed the highest prevalent rate in terms of stress, anxiety and depression. This may be because this meta-analysis included only HCPs from Egypt, which in turn might indicate that the Egyptian healthcare system was severely affected by COVID-19 compared to other countries [118].

The finding of this umbrella review highlights significant negative effect that the COVID-19 pandemic has had on the psychological health of HCPs, further emphasizing the need for regular mental health assessment and management in this population. Due to the increasing number of complex traumas that HCPs are experiencing, special attention should be paid to the development of positive traumatic growth. The higher prevalence of stress, anxiety, depression, and sleep disturbance among HCPs have important implications for both the policies and practices of the healthcare system under consideration. It is important to identify effective interventions for HCPs such as the behavioural and educational interventions that have been suggested, including the development of a sense of coherence, positive thinking, and social support [119–121]. Currently there is a lack of evidence about the effectiveness of some psychological interventions that were adapted for use during COVID-19 pandemic specifically for healthcare workers [122,123].

Heterogeneity was significant in the majority of the analyses; several reasons can be attributed to this prominence. Firstly, the individual studies within each meta-analysis might differ substantially in terms of their design, sample sizes, interventions or exposures, and outcome measures. These variations can lead to differing effect sizes or conclusions, making the integration of results into a cohesive summary more complex. Furthermore, heterogeneity can arise from variations in the quality of these studies. While some research might have been meticulously conducted with strict inclusion criteria and rigorous methodologies, other studies on healthcare workers may have inherent biases or confounding factors due to the rapidly changing nature of the pandemic, the pressures of lockdowns, and their effects.

The unique characteristics and experiences of healthcare workers during the COVID-19 crisis, compounded by the challenges of lockdown measures, have the potential to further amplify this variability. Factors such as age, gender, ethnicity, and underlying health conditions, when combined with the stress, increased workload, and challenges of the pandemic and lockdown situations, can significantly influence study outcomes. Additionally, methodological differences in individual studies, like the use of a wide variety of questionnaires to measure symptoms, varied cut-off points, and severity thresholds, as well as the absence of a consistent 'gold standard' for diagnostic interviews, can contribute to increased heterogeneity. In the context of the umbrella review, synthesizing findings from such a diverse collection of meta-analyses, particularly those focused on healthcare workers during this unparalleled period marked by fluctuating lockdown measures, poses a formidable challenge. Such complexity may constrain the robustness and precision of the conclusions drawn.

One of the most critical factors that policymakers need to consider when it comes to implementing effective interventions is the availability of organizational support. This can be done through various work-based interventions such as implementing shorter working hours and having buddy systems [124]. In addition, other measures such as providing mental health consultants and tele counselling can also help reduce the impact of the outbreak of disease on the well-being of staff members [125,126].

#### 4.1 Limitations

Several limitations must be taken into consideration when interpreting the results of this umbrella review even though one strength of this methodology is that it provides comprehensive evidence regarding the mental health problems that were faced by HCPs during the COVID-19 pandemic. First, there is a possibility of selection bias. For example, non-English language meta-analyses were not included in this umbrella review, and this may introduce a selection bias. Second, it may be the case that some meta-analyses may have included the same primary studies and that there is consequently a significant study overlap between the meta-analyses included in this review. However, since the results of the studies were then combined with other studies, and a new result was presented, these were regarded as being new studies [25]. Further, several researchers address overlapping by removing some of the reviews with higher rates of overlapping [26,127]. Although removing the overlapping meta-analyses solves the problem of dependent effects, it might introduce a bias of its own. Excluding one of two overlapping meta-analyses from an umbrella review will bias the overall estimate [128,129]. In addition, Hennessy and Johnson [127] clearly mention that the overlap of primary studies included in a meta-review is not necessarily a bias but often can be a benefit.

Third, the various methodologies of the primary studies that were included in the meta-analyses, in terms of sampling methods, assessment tools, operational definitions of the symptoms and study length, might have affected the sensitivity and specificity with regard to detecting the prevalence estimations of stress, anxiety, depression, and sleep disturbance [130]. Finally, it should be noted that stress, anxiety, depression, and sleep disturbance varied between the HCPs studied. Therefore, future research should focus on the difference contexts of estimation prevalence between HCPs and should report the prevalence in each group.

#### 5. Conclusion

In summary, this umbrella review systematically analyses the currently available evidence on the prevalence of stress, anxiety, depression, and sleep disturbance among HCPs in relation to COVID-19. It revealed that the incidence of these symptoms is high in the HCP population. However, there is wide variation in the degree of these conditions among this HCP population.

This may be due to the varying experiences of COVID-19 and the cultural differences in the countries where the studies have been carried out. It is clear from the current evidence that strategies involving multi-level interventions are required to develop effective interventions that can help improve the mental health and well-being of HCPs and foster post-traumatic growth. Further research needs to address the limitations of the existing literature, in order to enable the authorities, providers, and patients to improve the quality of mental health on the part of HCPs.

## Supporting information

**S1 Checklist. PRISMA 2020 checklist.**

(DOCX)

**S1 Table. Quality assessment result of meta analysis using the AMSTAR-2 (N = 72).**

(DOCX)

## Author Contributions

**Conceptualization:** Mohammed Al Maqbali, Ahmad Alsayed, Ciara Hughes, Eileen Hacker, Geoffrey L. Dickens.

**Data curation:** Mohammed Al Maqbali, Ahmad Alsayed, Ciara Hughes, Eileen Hacker, Geoffrey L. Dickens.

**Formal analysis:** Mohammed Al Maqbali, Ahmad Alsayed, Ciara Hughes, Eileen Hacker, Geoffrey L. Dickens.

**Funding acquisition:** Mohammed Al Maqbali, Ahmad Alsayed, Ciara Hughes, Eileen Hacker, Geoffrey L. Dickens.

**Investigation:** Mohammed Al Maqbali, Ahmad Alsayed, Ciara Hughes, Eileen Hacker, Geoffrey L. Dickens.

**Methodology:** Mohammed Al Maqbali, Ahmad Alsayed, Ciara Hughes, Eileen Hacker, Geoffrey L. Dickens.

**Project administration:** Mohammed Al Maqbali, Ahmad Alsayed, Ciara Hughes, Eileen Hacker, Geoffrey L. Dickens.

**Resources:** Mohammed Al Maqbali, Geoffrey L. Dickens.

**Software:** Mohammed Al Maqbali, Geoffrey L. Dickens.

**Supervision:** Mohammed Al Maqbali, Geoffrey L. Dickens.

**Validation:** Mohammed Al Maqbali, Geoffrey L. Dickens.

**Visualization:** Mohammed Al Maqbali, Geoffrey L. Dickens.

**Writing – original draft:** Mohammed Al Maqbali, Ahmad Alsayed, Ciara Hughes, Eileen Hacker, Geoffrey L. Dickens.

**Writing – review & editing:** Mohammed Al Maqbali, Ahmad Alsayed, Ciara Hughes, Eileen Hacker, Geoffrey L. Dickens.

## References

1. WHO. International Health Regulations Emergency Committee on novel coronavirus in China. 2020 [cited 12 Sep 2020]. Available: <https://www.who.int/news-room/events/detail/2020/01/30/default-calendar/international-health-regulations-emergency-committee-on-novel-coronavirus-in-china>.
2. Hill JE, Harris C, Danielle L C, Boland P, Doherty AJ, Benedetto V, et al. The prevalence of mental health conditions in healthcare workers during and after a pandemic: Systematic review and meta-analysis. *J Adv Nurs*. 2022; 78: 1551–1573. <https://doi.org/10.1111/jan.15175> PMID: 35150151
3. Chirico F, Ferrari G, Nucera G, Szarpak L, Crescenzo P, Ilesanmi O. Prevalence of anxiety, depression, burnout syndrome, and mental health disorders among healthcare workers during the COVID-19 pandemic: A rapid umbrella review of systematic reviews. 2021; 6: 209–220. <https://doi.org/10.19204/2021/prv17>
4. Chirico F, Crescenzo P, Sacco A, Ricco M, Ripa S, Nucera G, et al. Prevalence of burnout syndrome among Italian volunteers of the Red Cross: a cross-sectional study. *Industrial health*. 2021; 59: 117–127. <https://doi.org/10.2486/indhealth.2020-0246> PMID: 33473066
5. Magnavita N, Chirico F, Sacco A. COVID-19: from hospitals to courts. *The Lancet*. 2021; 397: 1542. [https://doi.org/10.1016/S0140-6736\(21\)00472-4](https://doi.org/10.1016/S0140-6736(21)00472-4) PMID: 33894829
6. Smallwood N, Harrex W, Rees M, Willis K, Bennett CM. COVID-19 infection and the broader impacts of the pandemic on healthcare workers. *Respirology*. 2022; 27: 411–426. <https://doi.org/10.1111/resp.14208> PMID: 35048469
7. Chen J, Zhang SX, Yin A, Yáñez JA. Mental health symptoms during the COVID-19 pandemic in developing countries: A systematic review and meta-analysis. *J Glob Health*. 2022; 12: 05011. <https://doi.org/10.7189/jogh.12.05011> PMID: 35604881
8. Zhang SX, Chen RZ, Xu W, Yin A, Dong RK, Chen BZ, et al. A Systematic Review and Meta-Analysis of Symptoms of Anxiety, Depression, and Insomnia in Spain in the COVID-19 Crisis. *Int J Environ Res Public Health*. 2022; 19: 1018. <https://doi.org/10.3390/ijerph19021018> PMID: 35055841
9. Gm M, Am L, V C, C C, Kw T, Pc S, et al. Immediate and sustained psychological impact of an emerging infectious disease outbreak on health care workers. *Canadian journal of psychiatry Revue canadienne de psychiatrie*. 2007; 52. <https://doi.org/10.1177/070674370705200406> PMID: 17500305
10. Lee SM, Kang WS, Cho A-R, Kim T, Park JK. Psychological impact of the 2015 MERS outbreak on hospital workers and quarantined hemodialysis patients. *Comprehensive Psychiatry*. 2018; 87: 123–127. <https://doi.org/10.1016/j.comppsy.2018.10.003> PMID: 30343247
11. Liu X, Kakade M, Fuller CJ, Fan B, Fang Y, Kong J, et al. Depression after exposure to stressful events: lessons learned from the severe acute respiratory syndrome epidemic. *Comprehensive Psychiatry*. 2012; 53: 15–23. <https://doi.org/10.1016/j.comppsy.2011.02.003> PMID: 21489421
12. Liu Y, Gayle AA, Wilder-Smith A, Rocklöv J. The reproductive number of COVID-19 is higher compared to SARS coronavirus. *J Travel Med*. 2020; 27: taaa021. <https://doi.org/10.1093/jtm/taaa021> PMID: 32052846
13. Søvold LE, Naslund JA, Kousoulis AA, Saxena S, Qoronfle MW, Grobler C, et al. Prioritizing the Mental Health and Well-Being of Healthcare Workers: An Urgent Global Public Health Priority. *Frontiers in Public Health*. 2021; 9. Available: <https://www.frontiersin.org/articles/10.3389/fpubh.2021.679397>. <https://doi.org/10.3389/fpubh.2021.679397> PMID: 34026720
14. Bismark M, Smallwood N, Jain R, Willis K. Thoughts of suicide or self-harm among healthcare workers during the COVID-19 pandemic: qualitative analysis of open-ended survey responses. *BJPsych Open*. 2022; 8: e113. <https://doi.org/10.1192/bjo.2022.509> PMID: 35699151
15. National Institutes of Health. National institutes of health sleep disorders research plan. Maryland, USA: National Institutes of Health; 2011 pp. 1–34. Available: <https://www.nhlbi.nih.gov/files/docs/ncsdr/201101011NationalSleepDisordersResearchPlanDHHSPublication11-7820.pdf>.
16. Association American Psychiatric. Diagnostic and Statistical Manual of Mental Disorders, 5th Edition: DSM-5. 5th edition. Washington, D.C: American Psychiatric Publishing; 2013.
17. Cohen S, Kamarck T, Mermelstein R. A Global Measure of Perceived Stress. *Journal of Health and Social Behavior*. 1983; 24: 385–396. <https://doi.org/10.2307/2136404> PMID: 6668417
18. Fernandez R, Sikhosana N, Green H, Halcomb EJ, Middleton R, Alananzeh I, et al. Anxiety and depression among healthcare workers during the COVID-19 pandemic: a systematic umbrella review of the global evidence. *BMJ Open*. 2021; 11: e054528. <https://doi.org/10.1136/bmjopen-2021-054528> PMID: 34548373
19. Sahebi A, Abdi K, Moayedi S, Torres M, Golitaleb M. The prevalence of insomnia among health care workers amid the COVID-19 pandemic: An umbrella review of meta-analyses. *J Psychosom Res*. 2021; 149: 110597. <https://doi.org/10.1016/j.jpsychores.2021.110597> PMID: 34388380

20. de Sousa GM, Tavares VD de O, de Meiroz Grilo MLP, Coelho MLG, de Lima-Araújo GL, Schuch FB, et al. Mental Health in COVID-19 Pandemic: A Meta-Review of Prevalence Meta-Analyses. *Front Psychol.* 2021; 12: 703838. <https://doi.org/10.3389/fpsyg.2021.703838> PMID: 34621212
21. Page MJ, Moher D, Bossuyt PM, Boutron I, Hoffmann TC, Mulrow CD, et al. PRISMA 2020 explanation and elaboration: updated guidance and exemplars for reporting systematic reviews. *BMJ.* 2021; 372: n160. <https://doi.org/10.1136/bmj.n160> PMID: 33781993
22. Shea BJ, Reeves BC, Wells G, Thuku M, Hamel C, Moran J, et al. AMSTAR 2: a critical appraisal tool for systematic reviews that include randomised or non-randomised studies of healthcare interventions, or both. *BMJ.* 2017; 358: j4008. <https://doi.org/10.1136/bmj.j4008> PMID: 28935701
23. Fusar-Poli P, Radua J. Ten simple rules for conducting umbrella reviews. *BMJ Ment Health.* 2018; 21: 95–100. <https://doi.org/10.1136/ebmental-2018-300014> PMID: 30006442
24. Belbasis L, Brooker RD, Zavalis E, Pezzullo AM, Axfors C, Ioannidis JP. Mapping and systematic appraisal of umbrella reviews in epidemiological research: a protocol for a meta-epidemiological study. *Systematic Reviews.* 2023; 12: 123. <https://doi.org/10.1186/s13643-023-02265-7> PMID: 37452309
25. Pollock M, Fernandes RM, Becker LA, Pieper D, Butler LD. Chapter V: Overviews of Reviews. 2nd ed. In: Higgins JP, Thomas J, Chandell J, Cumpston M, Li T, Page M, et al., editors. *Cochrane Handbook for Systematic Reviews of Interventions* 63. 2nd ed. Chichester (UK): John Wiley & Sons; 2022. Available: [www.training.cochrane.org/handbook](http://www.training.cochrane.org/handbook).
26. Lunny C, Pieper D, Thabet P, Kanji S. Managing overlap of primary study results across systematic reviews: practical considerations for authors of overviews of reviews. *BMC Medical Research Methodology.* 2021; 21: 140. <https://doi.org/10.1186/s12874-021-01269-y> PMID: 34233615
27. Tang LL, Caudy M, Taxman F. A Statistical Method for Synthesizing Meta-Analyses. *Computational and Mathematical Methods in Medicine.* 2013; 2013: e732989. <https://doi.org/10.1155/2013/732989> PMID: 24194787
28. Makowski D, Catarino R, Chen M, Bosco S, Montero-Castaño A, Pérez-Soba M, et al. Synthesising results of meta-analyses to inform policy: a comparison of fast-track methods. *Environmental Evidence.* 2023; 12: 16. <https://doi.org/10.1186/s13750-023-00309-y>
29. Schwarzer G, Carpenter JR, Rücker G. *Meta-Analysis with R.* Cham: Springer International Publishing; 2015. <https://doi.org/10.1007/978-3-319-21416-0>
30. Viechtbauer W. Conducting Meta-Analyses in R with the metafor Package. *Journal of Statistical Software.* 2010; 36: 1–48. <https://doi.org/10.18637/jss.v036.i03>
31. Gosling CJ, Solanes A, Fusar-Poli P, Radua J. metaumbrella: the first comprehensive suite to perform data analysis in umbrella reviews with stratification of the evidence. *BMJ Ment Health.* 2023; 26. <https://doi.org/10.1136/bmjment-2022-300534> PMID: 36792173
32. Higgins JPT, Thompson SG, Deeks JJ, Altman DG. Measuring inconsistency in meta-analyses. *BMJ.* 2003; 327: 557–560. <https://doi.org/10.1136/bmj.327.7414.557> PMID: 12958120
33. Egger M, Smith GD, Schneider M, Minder C. Bias in meta-analysis detected by a simple, graphical test. *BMJ.* 1997; 315: 629–634. <https://doi.org/10.1136/bmj.315.7109.629> PMID: 9310563
34. Duval S, Tweedie R. Trim and fill: A simple funnel-plot-based method of testing and adjusting for publication bias in meta-analysis. *Biometrics.* 2000; 56: 455–463. <https://doi.org/10.1111/j.0006-341x.2000.00455.x> PMID: 10877304
35. Patsopoulos NA, Evangelou E, Ioannidis JPA. Sensitivity of between-study heterogeneity in meta-analysis: proposed metrics and empirical evaluation. *Int J Epidemiol.* 2008; 37: 1148–1157. <https://doi.org/10.1093/ije/dyn065> PMID: 18424475
36. Mathur MB, VanderWeele TJ. Sensitivity analysis for publication bias in meta-analyses. *J R Stat Soc Ser C Appl Stat.* 2020; 69: 1091–1119. <https://doi.org/10.1111/rssc.12440> PMID: 33132447
37. Allan SM, Bealey R, Birch J, Cushing T, Parke S, Sergi G, et al. The prevalence of common and stress-related mental health disorders in healthcare workers based in pandemic-affected hospitals: a rapid systematic review and meta-analysis. *Eur J Psychotraumatol.* 2020; 11: 1810903. <https://doi.org/10.1080/20008198.2020.1810903> PMID: 33244359
38. Batra K, Singh TP, Sharma M, Batra R, Schvaneveldt N. Investigating the Psychological Impact of COVID-19 among Healthcare Workers: A Meta-Analysis. *Int J Environ Res Public Health.* 2020; 17: E9096. <https://doi.org/10.3390/ijerph17239096> PMID: 33291511
39. Krishnamoorthy Y, Nagarajan R, Saya GK, Menon V. Prevalence of psychological morbidities among general population, healthcare workers and COVID-19 patients amidst the COVID-19 pandemic: A systematic review and meta-analysis. *Psychiatry Res.* 2020; 293: 113382. <https://doi.org/10.1016/j.psychres.2020.113382> PMID: 32829073

40. Pan R, Zhang L, Pan J. The Anxiety Status of Chinese Medical Workers During the Epidemic of COVID-19: A Meta-Analysis. *Psychiatry Investig.* 2020; 17: 475–480. <https://doi.org/10.30773/pi.2020.0127> PMID: 32403209
41. Pappa S, Ntella V, Giannakas T, Giannakoulis VG, Papoutsis E, Katsaounou P. Prevalence of depression, anxiety, and insomnia among healthcare workers during the COVID-19 pandemic: A systematic review and meta-analysis. *Brain Behav Immun.* 2020; 88: 901–907. <https://doi.org/10.1016/j.bbi.2020.05.026> PMID: 32437915
42. Qiu D, Yu Y, Li R-Q, Li Y-L, Xiao S-Y. Prevalence of sleep disturbances in Chinese healthcare professionals: a systematic review and meta-analysis. *Sleep Medicine.* 2020; 67: 258–266. <https://doi.org/10.1016/j.sleep.2019.01.047> PMID: 31040078
43. Ren X, Huang W, Pan H, Huang T, Wang X, Ma Y. Mental Health During the Covid-19 Outbreak in China: a Meta-Analysis. *Psychiatr Q.* 2020; 91: 1033–1045. <https://doi.org/10.1007/s1126-020-09796-5> PMID: 32642822
44. Salari N, Khazaie H, Hosseini-Far A, Ghasemi H, Mohammadi M, Shohaimi S, et al. The prevalence of sleep disturbances among physicians and nurses facing the COVID-19 patients: a systematic review and meta-analysis. *Global Health.* 2020; 16: 92. <https://doi.org/10.1186/s12992-020-00620-0> PMID: 32993696
45. Salari N, Khazaie H, Hosseini-Far A, Khaledi-Paveh B, Kazemian M, Mohammadi M, et al. The prevalence of stress, anxiety and depression within front-line healthcare workers caring for COVID-19 patients: a systematic review and meta-regression. *Hum Resour Health.* 2020; 18: 100. <https://doi.org/10.1186/s12960-020-00544-1> PMID: 33334335
46. Salazar de Pablo G, Vaquerizo-Serrano J, Catalan A, Arango C, Moreno C, Ferre F, et al. Impact of coronavirus syndromes on physical and mental health of health care workers: Systematic review and meta-analysis. *J Affect Disord.* 2020; 275: 48–57. <https://doi.org/10.1016/j.jad.2020.06.022> PMID: 32658823
47. Abdulla EK, Velladath SU, Varghese A, Anju M. Depression and anxiety associated with COVID-19 pandemic among healthcare professionals in India- A systematic review and meta-analysis. *Clin Epidemiol Glob Health.* 2021; 12: 100888. <https://doi.org/10.1016/j.cegh.2021.100888> PMID: 34751253
48. Adibi A, Golitaleb M, Farrahi-Ashtiani I, Pirani D, Yousefi K, Jamshidbeigi Y, et al. The Prevalence of Generalized Anxiety Disorder Among Health Care Workers During the COVID-19 Pandemic: A Systematic Review and Meta-Analysis. *Frontiers in Psychiatry.* 2021; 12. Available: <https://www.frontiersin.org/articles/10.3389/fpsy.2021.658846>. <https://doi.org/10.3389/fpsy.2021.658846> PMID: 34135784
49. Al Maqbali M, Al Sinani M, Al-Lenjawi B. Prevalence of stress, depression, anxiety and sleep disturbance among nurses during the COVID-19 pandemic: A systematic review and meta-analysis. *J Psychosom Res.* 2021; 141: 110343. <https://doi.org/10.1016/j.jpsychores.2020.110343> PMID: 33360329
50. Alimoradi Z, Broström A, Tsang HWH, Griffiths MD, Haghayegh S, Ohayon MM, et al. Sleep problems during COVID-19 pandemic and its' association to psychological distress: A systematic review and meta-analysis. *EClinicalMedicine.* 2021; 36: 100916. <https://doi.org/10.1016/j.eclinm.2021.100916> PMID: 34131640
51. Bareeqa SB, Ahmed SI, Samar SS, Yasin W, Zehra S, Monese GM, et al. Prevalence of depression, anxiety and stress in china during COVID-19 pandemic: A systematic review with meta-analysis. *Int J Psychiatry Med.* 2021; 56: 210–227. <https://doi.org/10.1177/0091217420978005> PMID: 33243029
52. Cénat JM, Blais-Rochette C, Kokou-Kpolou CK, Noorishad P-G, Mukunzi JN, McIntee S-E, et al. Prevalence of symptoms of depression, anxiety, insomnia, posttraumatic stress disorder, and psychological distress among populations affected by the COVID-19 pandemic: A systematic review and meta-analysis. *Psychiatry Res.* 2021; 295: 113599. <https://doi.org/10.1016/j.psychres.2020.113599> PMID: 33285346
53. Ching SM, Ng KY, Lee KW, Yee A, Lim PY, Ranita H, et al. Psychological distress among healthcare providers during COVID-19 in Asia: Systematic review and meta-analysis. *PLoS One.* 2021; 16: e0257983. <https://doi.org/10.1371/journal.pone.0257983> PMID: 34648526
54. Crocama C, Bachi B, Calabrese A, Callovin T, Cavaleri D, Cioni RM, et al. Some of us are most at risk: Systematic review and meta-analysis of correlates of depressive symptoms among healthcare workers during the SARS-CoV-2 outbreak. *Neurosci Biobehav Rev.* 2021; 131: 912–922. <https://doi.org/10.1016/j.neubiorev.2021.10.010> PMID: 34655656
55. Deng Y, Chen Y, Zhang B. Different prevalence trend of depression and anxiety among healthcare workers and general public before and after the peak of COVID-19 occurred in China: A meta-analysis. *Asian J Psychiatr.* 2021; 56: 102547. <https://doi.org/10.1016/j.ajp.2021.102547> PMID: 33465749

56. Dong F, Liu H, Yang M, Lu C, Dai N, Zhang Y, et al. Immediate Psychosocial Impact on Healthcare Workers During COVID-19 Pandemic in China: A Systematic Review and Meta-Analysis. *Front Psychol.* 2021; 12: 645460. <https://doi.org/10.3389/fpsyg.2021.645460> PMID: 34122233
57. Dutta A, Sharma A, Torres-Castro R, Pachori H, Mishra S. Mental health outcomes among health-care workers dealing with COVID-19/severe acute respiratory syndrome coronavirus 2 pandemic: A systematic review and meta-analysis. *Indian J Psychiatry.* 2021; 63: 335–347. [https://doi.org/10.4103/psychiatry.IndianJPsychiatry\\_1029\\_20](https://doi.org/10.4103/psychiatry.IndianJPsychiatry_1029_20) PMID: 34456346
58. El-Qushayri AE, Dahy A, Reda A, Mahmoud MA, Mageed SA, Kamel AMA, et al. A closer look at the high burden of psychiatric disorders among healthcare workers in Egypt during the COVID-19 pandemic. *Epidemiol Health.* 2021; 43: e2021045. <https://doi.org/10.4178/epih.e2021045> PMID: 34265893
59. Halemani K, Issac A, Mishra P, Dhiraaj S, Mavinatop S. Prevalence of Anxiety, Depression, Stress, and Insomnia among Healthcare Workers during Covid-19: A Systematic Review and Meta-Analysis. *NJI.* 2021; CXII: 269–277. <https://doi.org/10.48029/NJI.2021.CXII605>
60. Hao Q, Wang D, Xie M, Tang Y, Dou Y, Zhu L, et al. Prevalence and Risk Factors of Mental Health Problems Among Healthcare Workers During the COVID-19 Pandemic: A Systematic Review and Meta-Analysis. *Front Psychiatry.* 2021; 12: 567381. <https://doi.org/10.3389/fpsyg.2021.567381> PMID: 34211406
61. Hosen I, al-Mamun F, Mamun MA. Prevalence and risk factors of the symptoms of depression, anxiety, and stress during the COVID-19 pandemic in Bangladesh: a systematic review and meta-analysis. *Glob Ment Health (Camb).* 2021; 8: e47. <https://doi.org/10.1017/gmh.2021.49> PMID: 35145709
62. Hossain MM, Rahman M, Trisha NF, Tasnim S, Nuzhath T, Hasan NT, et al. Prevalence of anxiety and depression in South Asia during COVID-19: A systematic review and meta-analysis. *Heliyon.* 2021; 7: e06677. <https://doi.org/10.1016/j.heliyon.2021.e06677> PMID: 33898819
63. Jahrami H, BaHammam AS, Bragazzi NL, Saif Z, Faris M, Vitiello MV. Sleep problems during the COVID-19 pandemic by population: a systematic review and meta-analysis. *J Clin Sleep Med.* 2021; 17: 299–313. <https://doi.org/10.5664/jcsm.8930> PMID: 33108269
64. Li Y, Scherer N, Felix L, Kuper H. Prevalence of depression, anxiety and post-traumatic stress disorder in health care workers during the COVID-19 pandemic: A systematic review and meta-analysis. *PLoS One.* 2021; 16: e0246454. <https://doi.org/10.1371/journal.pone.0246454> PMID: 33690641
65. Liu X, Zhu M, Zhang R, Zhang J, Zhang C, Liu P, et al. Public mental health problems during COVID-19 pandemic: a large-scale meta-analysis of the evidence. *Transl Psychiatry.* 2021; 11: 384. <https://doi.org/10.1038/s41398-021-01501-9> PMID: 34244469
66. Mahmud S, Hossain S, Muyeed A, Islam MM, Mohsin Md. The global prevalence of depression, anxiety, stress, and, insomnia and its changes among health professionals during COVID-19 pandemic: A rapid systematic review and meta-analysis. *Heliyon.* 2021; 7: e07393. <https://doi.org/10.1016/j.heliyon.2021.e07393> PMID: 34278018
67. Marvaldi M, Mallet J, Dubertret C, Moro MR, Guessoum SB. Anxiety, depression, trauma-related, and sleep disorders among healthcare workers during the COVID-19 pandemic: A systematic review and meta-analysis. *Neurosci Biobehav Rev.* 2021; 126: 252–264. <https://doi.org/10.1016/j.neubiorev.2021.03.024> PMID: 33774085
68. Norhayati MN, Che Yusof R, Azman MY. Prevalence of Psychological Impacts on Healthcare Providers during COVID-19 Pandemic in Asia. *International Journal of Environmental Research and Public Health.* 2021; 18: 9157. <https://doi.org/10.3390/ijerph18179157> PMID: 34501747
69. Olaya B, Pérez-Moreno M, Bueno-Notivol J, Gracia-García P, Lasheras I, Santabárbara J. Prevalence of Depression among Healthcare Workers during the COVID-19 Outbreak: A Systematic Review and Meta-Analysis. *J Clin Med.* 2021; 10: 3406. <https://doi.org/10.3390/jcm10153406> PMID: 34362188
70. Phiri P, Ramakrishnan R, Rathod S, Elliot K, Thayanandan T, Sandle N, et al. An evaluation of the mental health impact of SARS-CoV-2 on patients, general public and healthcare professionals: A systematic review and meta-analysis. *eClinicalMedicine.* 2021; 34. <https://doi.org/10.1016/j.eclinm.2021.100806> PMID: 33842872
71. Raoofi S, Pashazadeh Kan F, Rafiei S, Khani S, Hosseinifard H, Tajik F, et al. Anxiety during the COVID-19 pandemic in hospital staff: systematic review plus meta-analysis. *BMJ Support Palliat Care.* 2021; bmjspcare-2021-003125. <https://doi.org/10.1136/bmjspcare-2021-003125> PMID: 34312187
72. Salehi M, Amanat M, Mohammadi M, Salmanian M, Rezaei N, Saghazadeh A, et al. The prevalence of post-traumatic stress disorder related symptoms in Coronavirus outbreaks: A systematic-review and meta-analysis. *J Affect Disord.* 2021; 282: 527–538. <https://doi.org/10.1016/j.jad.2020.12.188> PMID: 33433382

73. Santabábara J, Lasheras I, Lipnicki DM, Bueno-Notivol J, Pérez-Moreno M, López-Antón R, et al. Prevalence of anxiety in the COVID-19 pandemic: An updated meta-analysis of community-based studies. *Progress in Neuro-Psychopharmacology and Biological Psychiatry*. 2021; 109: 110207. <https://doi.org/10.1016/j.pnpbp.2020.110207> PMID: 33338558
74. Saragih ID, Tonapa SI, Saragih IS, Advani S, Batubara SO, Suarilah I, et al. Global prevalence of mental health problems among healthcare workers during the Covid-19 pandemic: A systematic review and meta-analysis. *International Journal of Nursing Studies*. 2021; 121: 104002. <https://doi.org/10.1016/j.ijnurstu.2021.104002> PMID: 34271460
75. Serrano-Ripoll MJ, Zamanillo-Campos R, Castro A, Fiol-de Roque MA, Ricci-Cabello I. Insomnia and sleep quality in healthcare workers fighting against COVID-19: a systematic review of the literature and meta-analysis. *Actas Esp Psiquiatr*. 2021; 49: 155–179. PMID: 34195971
76. Singh RK, Bajpai R, Kaswan P. COVID-19 pandemic and psychological wellbeing among health care workers and general population: A systematic-review and meta-analysis of the current evidence from India. *Clinical Epidemiology and Global Health*. 2021; 11. <https://doi.org/10.1016/j.cegh.2021.100737> PMID: 33898866
77. Sun P, Wang M, Song T, Wu Y, Luo J, Chen L, et al. The Psychological Impact of COVID-19 Pandemic on Health Care Workers: A Systematic Review and Meta-Analysis. *Front Psychol*. 2021; 12: 626547. <https://doi.org/10.3389/fpsyg.2021.626547> PMID: 34305703
78. Thakur B, Pathak M. Burden of Predominant Psychological Reactions Among the Healthcare Workers and General Population During COVID-19 Pandemic Phase: A Systematic Review and Meta-Analysis. *Indian J Community Med*. 2021; 46: 600–605. [https://doi.org/10.4103/ijcm.IJCM\\_1007\\_20](https://doi.org/10.4103/ijcm.IJCM_1007_20) PMID: 35068717
79. Varghese A, George G, Kondaguli SV, Naser AY, Khakha DC, Chatterji R. Decline in the mental health of nurses across the globe during COVID-19: A systematic review and meta-analysis. *J Glob Health*. 2021; 11: 05009. <https://doi.org/10.7189/jogh.11.05009> PMID: 33884193
80. Xia L, Chen C, Liu Z, Luo X, Guo C, Liu Z, et al. Prevalence of Sleep Disturbances and Sleep Quality in Chinese Healthcare Workers During the COVID-19 Pandemic: A Systematic Review and Meta-Analysis. *Front Psychiatry*. 2021; 12: 646342. <https://doi.org/10.3389/fpsyg.2021.646342> PMID: 33679493
81. Yan H, Ding Y, Guo W. Mental Health of Medical Staff During the Coronavirus Disease 2019 Pandemic: A Systematic Review and Meta-Analysis. *Psychosom Med*. 2021; 83: 387–396. <https://doi.org/10.1097/PSY.0000000000000922> PMID: 33818054
82. Zhang H, Li W, Li H, Zhang C, Luo J, Zhu Y, et al. Prevalence and dynamic features of psychological issues among Chinese healthcare workers during the COVID-19 pandemic: a systematic review and cumulative meta-analysis. *Gen Psychiatr*. 2021; 34: e100344. <https://doi.org/10.1136/gpsych-2020-100344> PMID: 34192242
83. Zhao Y-J, Jin Y, Rao W-W, Li W, Zhao N, Cheung T, et al. The prevalence of psychiatric comorbidities during the SARS and COVID-19 epidemics: a systematic review and meta-analysis of observational studies. *J Affect Disord*. 2021; 287: 145–157. <https://doi.org/10.1016/j.jad.2021.03.016> PMID: 33799032
84. Aymerich C, Pedruzo B, Pérez JL, Laborda M, Herrero J, Blanco J, et al. COVID-19 pandemic effects on health worker's mental health: Systematic review and meta-analysis. *Eur Psychiatry*. 2022; 65: e10. <https://doi.org/10.1192/j.eurpsy.2022.1> PMID: 35060458
85. Blasco-Belled A, Tejada-Gallardo C, Fatsini-Prats M, Alsinet C. Mental health among the general population and healthcare workers during the COVID-19 pandemic: A meta-analysis of well-being and psychological distress prevalence. *Curr Psychol*. 2022; 1–12. <https://doi.org/10.1007/s12144-022-02913-6> PMID: 35250245
86. Hu N, Deng H, Yang H, Wang C, Cui Y, Chen J, et al. The pooled prevalence of the mental problems of Chinese medical staff during the COVID-19 outbreak: A meta-analysis. *J Affect Disord*. 2022; 303: 323–330. <https://doi.org/10.1016/j.jad.2022.02.045> PMID: 35183620
87. Huang G, Chu H, Chen R, Liu D, Banda KJ, O'Brien AP, et al. Prevalence of depression, anxiety, and stress among first responders for medical emergencies during COVID-19 pandemic: A meta-analysis. *J Glob Health*. 2022; 12: 05028. <https://doi.org/10.7189/jogh.12.05028> PMID: 35871411
88. Johns G, Samuel V, Freemantle L, Lewis J, Waddington L. The global prevalence of depression and anxiety among doctors during the covid-19 pandemic: Systematic review and meta-analysis. *J Affect Disord*. 2022; 298: 431–441. <https://doi.org/10.1016/j.jad.2021.11.026> PMID: 34785264
89. Li Y, Chen B, Hong Z, Sun Q, Dai Y, Basta M, et al. Insomnia symptoms during the early and late stages of the COVID-19 pandemic in China: a systematic review and meta-analysis. *Sleep Medicine*. 2022; 91: 262–272. <https://doi.org/10.1016/j.sleep.2021.09.014> PMID: 34732293



90. Rezaei S, Hoseinipalangi Z, Rafiei S, Dolati Y, Hosseinfard H, Asl MT, et al. The global Prevalence of Depression among Health Workers during the COVID-19 pandemic: a Systematic review and Meta-analysis. *Journal of Affective Disorders Reports*. 2022; 8: 100326. <https://doi.org/10.1016/j.jadr.2022.100326> PMID: 35165672
91. Ślusarska B, Nowicki GJ, Niedorys-Karczmarczyk B, Chrzan-Rodak A. Prevalence of Depression and Anxiety in Nurses during the First Eleven Months of the COVID-19 Pandemic: A Systematic Review and Meta-Analysis. *Int J Environ Res Public Health*. 2022; 19: 1154. <https://doi.org/10.3390/ijerph19031154> PMID: 35162183
92. Tran QD, Vu TQC, Phan NQ. Depression prevalence in Vietnam during the Covid-19 pandemic: A systematic review and meta-analysis. *Ethics Med Public Health*. 2022; 23: 100806. <https://doi.org/10.1016/j.jemep.2022.100806> PMID: 35676918
93. Xiong N, Fritzsche K, Pan Y, Löhlein J, Leonhart R. The psychological impact of COVID-19 on Chinese healthcare workers: a systematic review and meta-analysis. *Soc Psychiatry Psychiatr Epidemiol*. 2022; 57: 1515–1529. <https://doi.org/10.1007/s00127-022-02264-4> PMID: 35325261
94. Zhang L, Yan M, Takashima K, Guo W, Yamada Y. The effect of the COVID-19 pandemic on health care workers' anxiety levels: a meta-analysis. *PeerJ*. 2022; 10: e13225. <https://doi.org/10.7717/peerj.13225> PMID: 35433133
95. Wu T, Jia X, Shi H, Niu J, Yin X, Xie J, et al. Prevalence of mental health problems during the COVID-19 pandemic: A systematic review and meta-analysis. *J Affect Disord*. 2021; 281: 91–98. <https://doi.org/10.1016/j.jad.2020.11.117> PMID: 33310451
96. Andhavarapu S, Yardi I, Bzhilyanskaya V, Lurie T, Bhinder M, Patel P, et al. Post-traumatic stress in healthcare workers during the COVID-19 pandemic: A systematic review and meta-analysis. *Psychiatry Res*. 2022; 317: 114890. <https://doi.org/10.1016/j.psychres.2022.114890> PMID: 36260970
97. Athe R, Dwivedi R, Singh K, Babusab Hulmani S, Karadi N, Boraiah C, et al. Impact of COVID-19 on the Mental Health of Healthcare Workers and Job Loss From a Gender Perspective in India: A Systematic Review and Meta-Analysis. *Cureus*. 2023; 15: e48219. <https://doi.org/10.7759/cureus.48219> PMID: 38050506
98. Cheung T, Cheng CPW, Fong TKH, Sharew NT, Anders RL, Xiang YT, et al. Psychological impact on healthcare workers, general population and affected individuals of SARS and COVID-19: A systematic review and meta-analysis. *Frontiers in Public Health*. 2022; 10. Available: <https://www.frontiersin.org/articles/10.3389/fpubh.2022.1004558>. <https://doi.org/10.3389/fpubh.2022.1004558> PMID: 36407973
99. Gheshlagh RG, Hassanpour-Dehkordi A, Moradi Y, Zahednezhad H, Mazaheri E, Kurdi A. Prevalence of Psychological Disorders among Health Workers During the COVID-19 Pandemic: A Systematic Review and Meta-Analysis. *Int J Prev Med*. 2023; 25–25. [https://doi.org/10.4103/ijpvm.ijpvm\\_212\\_21](https://doi.org/10.4103/ijpvm.ijpvm_212_21) PMID: 37033279
100. Hasen AA, Seid AA, Mohammed AA. Depression and insomnia among healthcare professionals during COVID-19 pandemic in Ethiopia: a systematic review and meta-analysis. *PeerJ*. 2023; 11: e15039. <https://doi.org/10.7717/peerj.15039> PMID: 36967998
101. Khobragade AW, Agrawal N. Prevalence of Stress and Insomnia among Health Care Workers in India during COVID-19 Pandemic: A Systematic Review and Meta-analysis. *Indian J Community Med*. 2023; 48: 525–532. [https://doi.org/10.4103/ijcm.ijcm\\_482\\_22](https://doi.org/10.4103/ijcm.ijcm_482_22) PMID: 37662125
102. Lee BEC, Ling M, Boyd L, Olsson C, Sheen J. The prevalence of probable mental health disorders among hospital healthcare workers during COVID-19: A systematic review and meta-analysis. *J Affect Disord*. 2023; 330: 329–345. <https://doi.org/10.1016/j.jad.2023.03.012> PMID: 36931567
103. Mamun MA, Al-Mamun F, Hosen I, Kaggwa MM, Sikder MT, Muhit M, et al. Prevalence and risk factors of sleep problems in Bangladesh during the COVID-19 pandemic: a systematic review and meta-analysis. *Sleep Epidemiol*. 2022; 2: 100045. <https://doi.org/10.1016/j.sleepe.2022.100045> PMID: 36250199
104. Sharma SK, Joseph J, Dhandapani M, Varghese A, Radha K, Das K, et al. The Psychological Morbidity among Health Care Workers During the Early Phase of Covid-19 Pandemic in India: A Systematic Review and Meta-Analysis. *Indian J Community Med*. 2023; 48: 12–23. [https://doi.org/10.4103/ijcm.ijcm\\_159\\_22](https://doi.org/10.4103/ijcm.ijcm_159_22) PMID: 37082389
105. Tong J, Zhang J, Zhu N, Pei Y, Liu W, Yu W, et al. Effects of COVID-19 pandemic on mental health among frontline healthcare workers: A systematic review and meta-analysis. *Front Psychol*. 2022; 13: 1096857. <https://doi.org/10.3389/fpsyg.2022.1096857> PMID: 36778177
106. Wang J, Luo Z, Liao X, Zeng Y, Zhou J, Liu M, et al. The levels and related factors of posttraumatic growth among nurses: A systematic review and meta-analysis. *J Psychiatr Ment Health Nurs*. 2023. <https://doi.org/10.1111/jpm.12975> PMID: 37724379

107. Sialakis C, Sialaki PA, Frantzana A, Iliadis C, Ouzounakis P, Kourkouta L. Prevalence of anxiety and depression of health care workers during COVID-19 –a systematic review and meta-analysis. *Med Pharm Rep.* 2023; 96: 246–253. <https://doi.org/10.15386/mpr-2579> PMID: 37577023
108. Hasen AA, Seid AA, Mohammed AA. Anxiety and stress among healthcare professionals during COVID-19 in Ethiopia: systematic review and meta-analysis. *BMJ Open.* 2023; 13: e070367. <https://doi.org/10.1136/bmjopen-2022-070367> PMID: 36750289
109. Nochaiwong S, Ruengorn C, Thavorn K, Hutton B, Awiphan R, Phosuya C, et al. Global prevalence of mental health issues among the general population during the coronavirus disease-2019 pandemic: a systematic review and meta-analysis. *Sci Rep.* 2021; 11: 10173. <https://doi.org/10.1038/s41598-021-89700-8> PMID: 33986414
110. WHO. World Health Organization: Depression and Other Common Global Health Estimates. Geneva, Switzerland: World Health Organization; 2017 pp. 1–24. Available: [https://scholar.google.com/scholar\\_lookup?title=Depression%20and%20Other%20Common%20Mental%20Disorders%3A%20Global%20Health%20Estimates&publication\\_year=2017](https://scholar.google.com/scholar_lookup?title=Depression%20and%20Other%20Common%20Mental%20Disorders%3A%20Global%20Health%20Estimates&publication_year=2017).
111. Bai Y, Lin C-C, Lin C-Y, Chen J-Y, Chue C-M, Chou P. Survey of stress reactions among health care workers involved with the SARS outbreak. *Psychiatr Serv.* 2004; 55: 1055–1057. <https://doi.org/10.1176/appi.ps.55.9.1055> PMID: 15345768
112. Chen C-S, Wu H-Y, Yang P, Yen C-F. Psychological distress of nurses in Taiwan who worked during the outbreak of SARS. *Psychiatr Serv.* 2005; 56: 76–79. <https://doi.org/10.1176/appi.ps.56.1.76> PMID: 15637196
113. Lancee WJ, Maunder RG, Goldbloom DS, Coauthors for the Impact of SARS Study. Prevalence of psychiatric disorders among Toronto hospital workers one to two years after the SARS outbreak. *Psychiatr Serv.* 2008; 59: 91–95. <https://doi.org/10.1176/ps.2008.59.1.91> PMID: 18182545
114. Tham K, Tan Y, Loh O, Tan W, Ong M, Tang H. Psychological Morbidity among Emergency Department Doctors and Nurses after the SARS Outbreak. *Hong Kong Journal of Emergency Medicine.* 2005; 12: 215–223. <https://doi.org/10.1177/102490790501200404>
115. Martin P, Tian E, Kumar S, Lizarondo L. A rapid review of the impact of COVID-19 on clinical supervision practices of healthcare workers and students in healthcare settings. *Journal of Advanced Nursing.* 2022; 78: 3531–3539. <https://doi.org/10.1111/jan.15360> PMID: 35841328
116. Palmer J, Ku M, Wang H, Crosse K, Bennett A, Lee E, et al. Public health emergency and psychological distress among healthcare workers: a scoping review. *BMC Public Health.* 2022; 22: 1396. <https://doi.org/10.1186/s12889-022-13761-1> PMID: 35858867
117. Sheikhbardsiri H, Doustmohammadi MM, Afshar PJ, Heidarijamebozorgi M, Khankeh H, Beyramijam M. Anxiety, stress and depression levels among nurses of educational hospitals in Iran: Time of performing nursing care for suspected and confirmed COVID-19 patients. *J Educ Health Promot.* 2021; 10: 447. [https://doi.org/10.4103/jehp.jehp\\_1319\\_20](https://doi.org/10.4103/jehp.jehp_1319_20) PMID: 35233394
118. Abd El Ghaffar MM, Salem MR, Al Soda MF, Abd El Razik MS, Tahoon MH, Tahoon MF, et al. COVID-19 Pandemic Preparedness in Egypt's Teaching Hospitals: A Needs Assessment Study. *Frontiers in Public Health.* 2022; 9. Available: <https://www.frontiersin.org/articles/10.3389/fpubh.2021.748666>. <https://doi.org/10.3389/fpubh.2021.748666> PMID: 35111710
119. Hooper JJ, Saulsman L, Hall T, Waters F. Addressing the psychological impact of COVID-19 on healthcare workers: learning from a systematic review of early interventions for frontline responders. *BMJ Open.* 2021; 11: e044134. <https://doi.org/10.1136/bmjopen-2020-044134> PMID: 34020974
120. Labrague LJ. Psychological resilience, coping behaviours and social support among health care workers during the COVID-19 pandemic: A systematic review of quantitative studies. *Journal of Nursing Management.* 2021; 29: 1893–1905. <https://doi.org/10.1111/jonm.13336> PMID: 33843087
121. Rykkje L, Søvnik MB, Ross L, McSherry W, Cone P, Giske T. Educational interventions and strategies for spiritual care in nursing and healthcare students and staff: A scoping review. *Journal of Clinical Nursing.* 2022; 31: 1440–1464. <https://doi.org/10.1111/jocn.16067> PMID: 34611922
122. Schoultz M, McGrogan C, Beattie M, Macaden L, Carolan C, Polson R, et al. Psychological first aid for workers in care and nursing homes: systematic review. *BMC Nurs.* 2022; 21: 1–6. <https://doi.org/10.1186/s12912-021-00740-x> PMID: 34983509
123. Chirico F, Nowrouzi-Kia B. Post-COVID-19 syndrome and new challenges posed by climate change require an interdisciplinary approach: the role of occupational health services. *J Health Soc Sci.* 2022; 2: 132–6.
124. Goldberg SB, Lam SU, Simonsson O, Torous J, Sun S. Mobile phone-based interventions for mental health: A systematic meta-review of 14 meta-analyses of randomized controlled trials. *PLOS Digital Health.* 2022; 1: e0000002. <https://doi.org/10.1371/journal.pdig.0000002> PMID: 35224559
125. Gupta S, Kumar M, Rozatkar AR, Basera D, Purwar S, Gautam D, et al. Feasibility and Effectiveness of Telecounseling on the Psychological Problems of Frontline Healthcare Workers Amidst COVID-19:

- A Randomized Controlled Trial from Central India. *Indian Journal of Psychological Medicine*. 2021; 43: 343–350. <https://doi.org/10.1177/02537176211024537> PMID: 34385729
126. Singh S, Sagar R. Tele mental health helplines during the COVID-19 pandemic: Do we need guidelines? *Asian J Psychiatr*. 2022; 67: 102916. <https://doi.org/10.1016/j.ajp.2021.102916> PMID: 34781242
  127. Hennessy EA, Johnson BT. Examining Overlap of Included Studies in Meta-Reviews: Guidance for using the Corrected Covered Area Index. *Res Synth Methods*. 2020; 11: 134–145. <https://doi.org/10.1002/jrsm.1390> PMID: 31823513
  128. Cooper H, Koenka AC. The overview of reviews: unique challenges and opportunities when research syntheses are the principal elements of new integrative scholarship. *Am Psychol*. 2012; 67: 446–462. <https://doi.org/10.1037/a0027119> PMID: 22352742
  129. Munder T, Brüttsch O, Leonhart R, Gerger H, Barth J. Researcher allegiance in psychotherapy outcome research: An overview of reviews. *Clinical Psychology Review*. 2013; 33: 501–511. <https://doi.org/10.1016/j.cpr.2013.02.002> PMID: 23500154
  130. Chirico F, Magnavita N. Burnout Syndrome and Meta-Analyses: Need for Evidence-Based Research in Occupational Health. Comments on Prevalence of Burnout in Medical and Surgical Residents: A Meta-Analysis. *Int. J. Environ. Res. Public. Health*. 2019, 16, <https://doi.org/10.3390/ijerph16091479>. *International Journal of Environmental Research and Public Health*. 2020; 17: 741. <https://doi.org/10.3390/ijerph17030741> PMID: 31979315
